# Supplementary material
Source: Research Square preprint supplement (doi:10.21203/rs.3.rs-5891448/v1)
Supplement: Supplementary file 1 [file 467b66cbd4507adcac790527.docx]

**
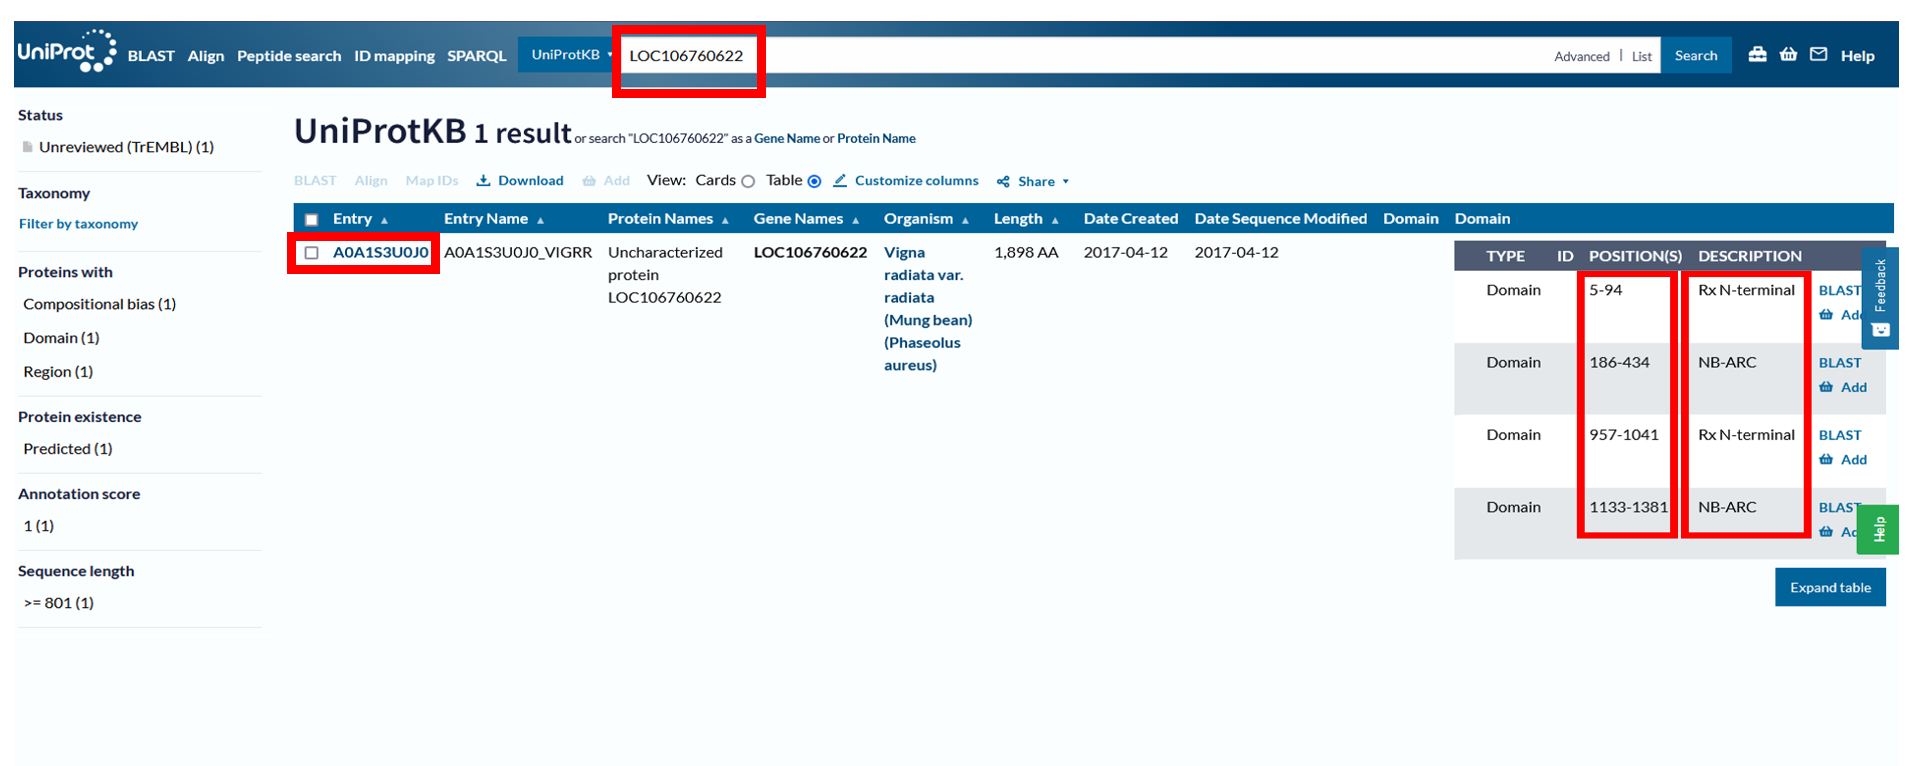
**

**Figure S1** Not Merely Conserved Domains (NMCD) within the same R protein. The presence of NB-ARC and RX_N-terminal domains occurring twice within the same R protein (A0A1S3U0J0) at different positions indicates the occurrence of NMCD (highlighted in red color).


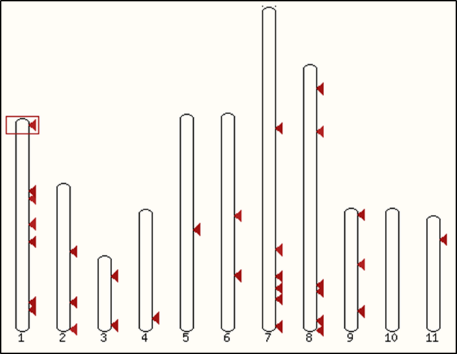

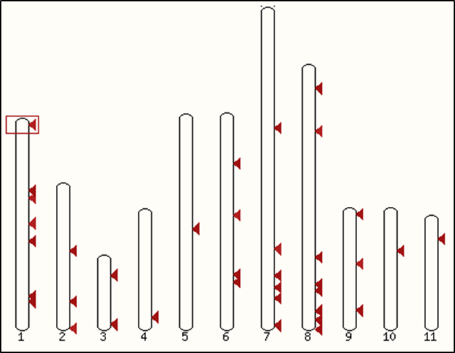

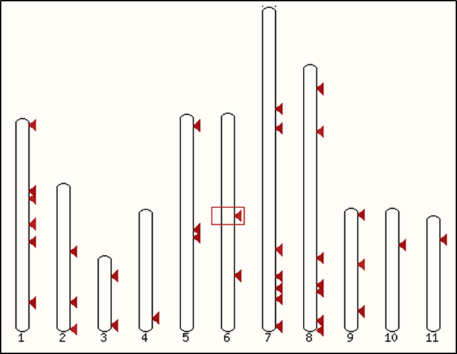


**C)**

**B)**

**A)**

KR350634.1 HQ704838.1 HQ704837.1


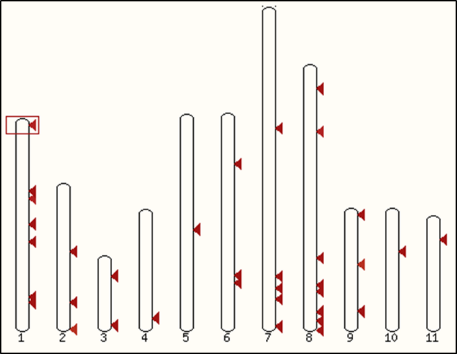

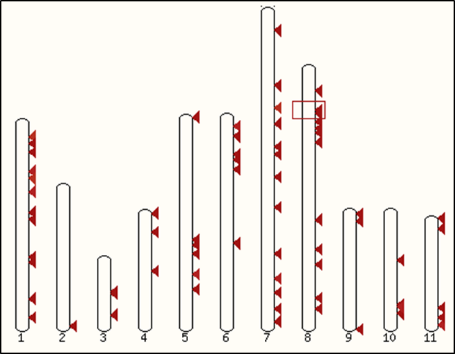

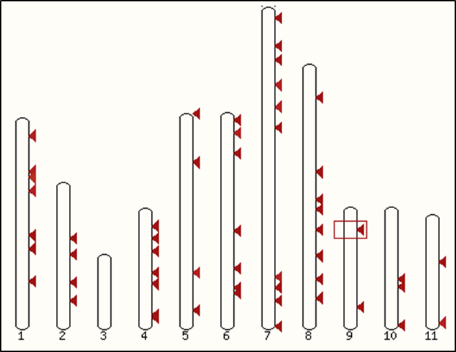


**D)**

**E)**

**F)**

EU258701.1 EU258700.1 EF446378.1


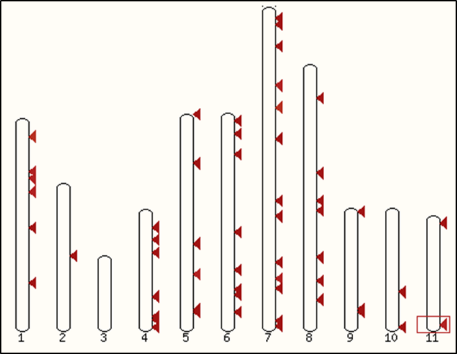

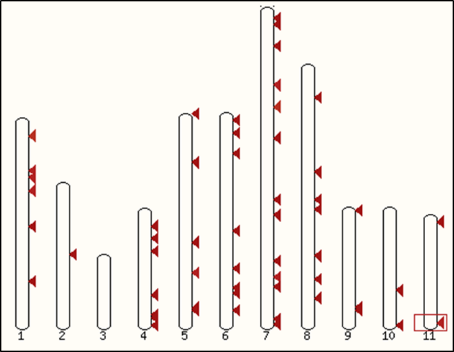

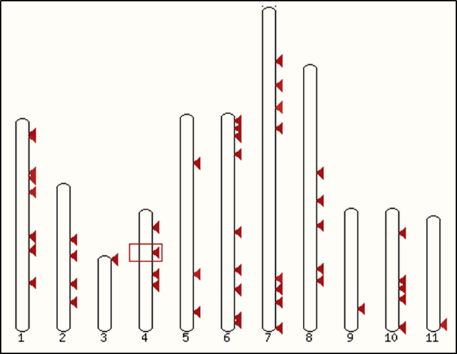


**G)**

**H)**

**I)**

AY301991.1 AY297425.2 XM_014647468.2


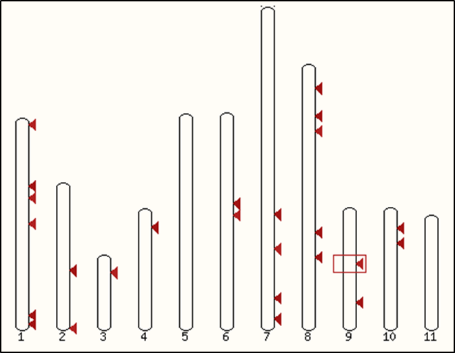

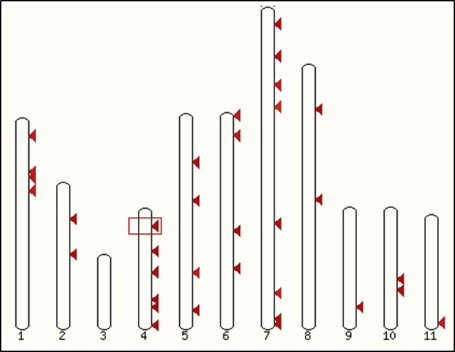

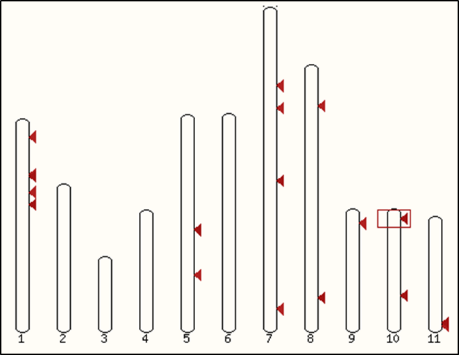


**L)**

**K)**

**J)**

AY301990.1 KF021265.1 KF661551.1


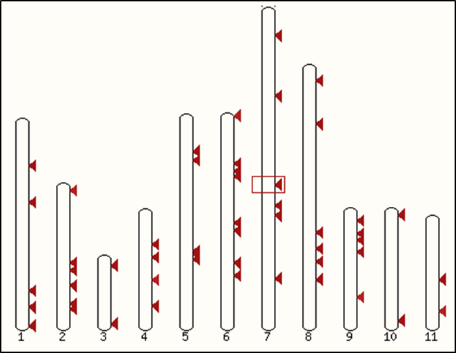

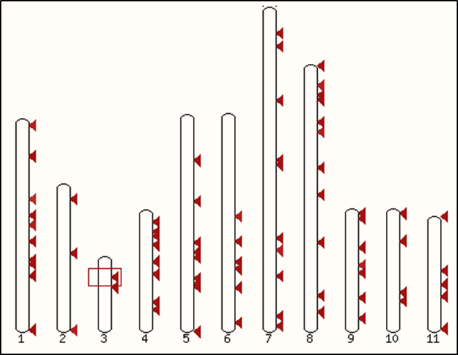

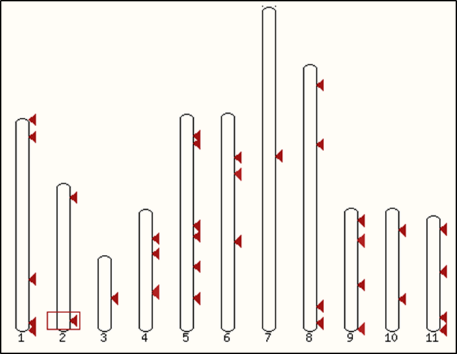


**O)**

**N)**

**M)**

XM_014649096.2 XM_022781464.1 CP039352.1


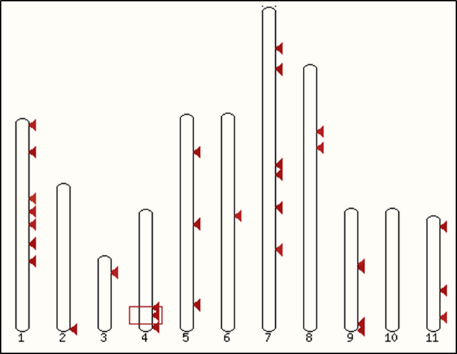


**P)**

AP015039.1

**Figure S2** Identification of redundancy in R genes using High-Scoring Segment Pair (HSP) Blast analysis in the Ensembl Plants database. The figure illustrates the redundancy and chromosomal distribution of collected R genes (Table S1) in the *V. radiata* genome, highlighting multiple copies of similar regions across different chromosomes (indicated by red arrows). This analysis provides insights into the potential functional redundancy of R genes in the *Vigna* genome. The distribution of NB-ARC domain-specific R genes (A-P) is shown.

**A)**


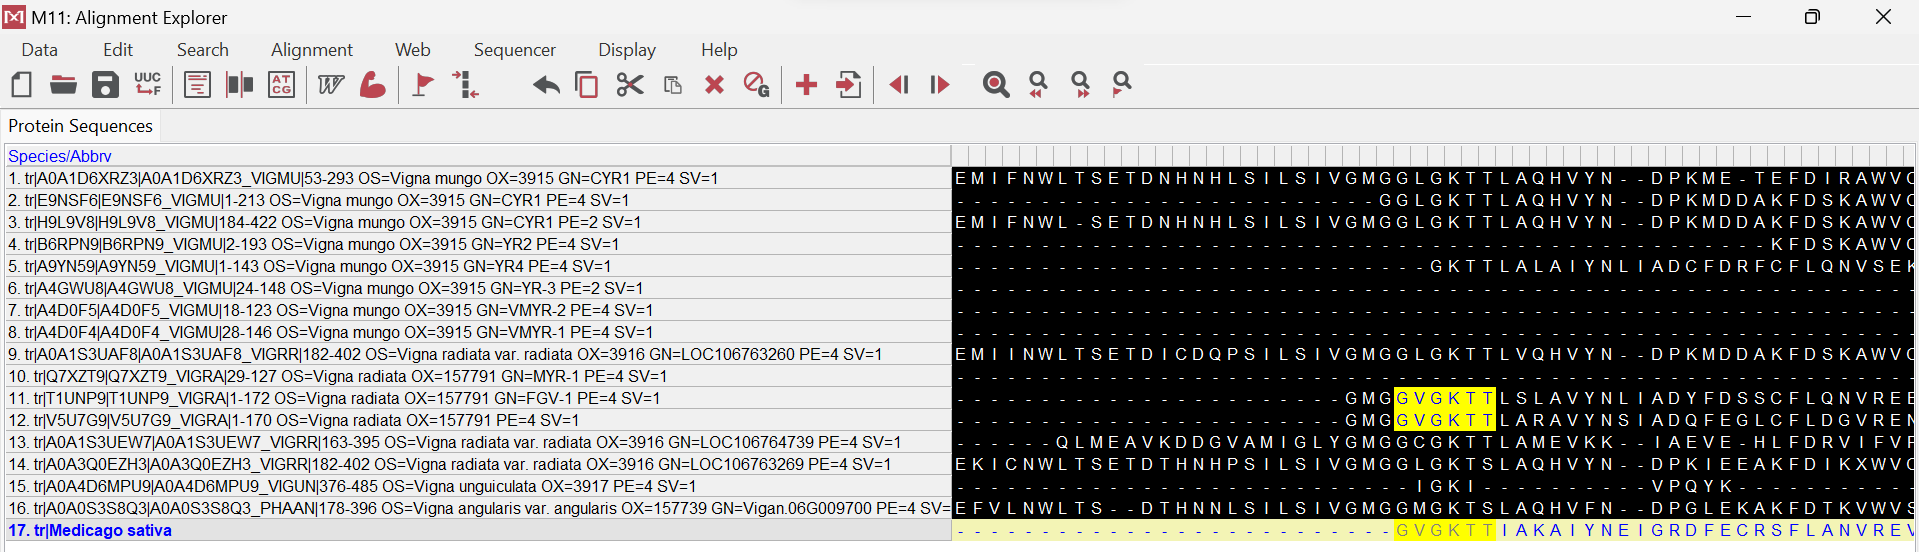


**B)**


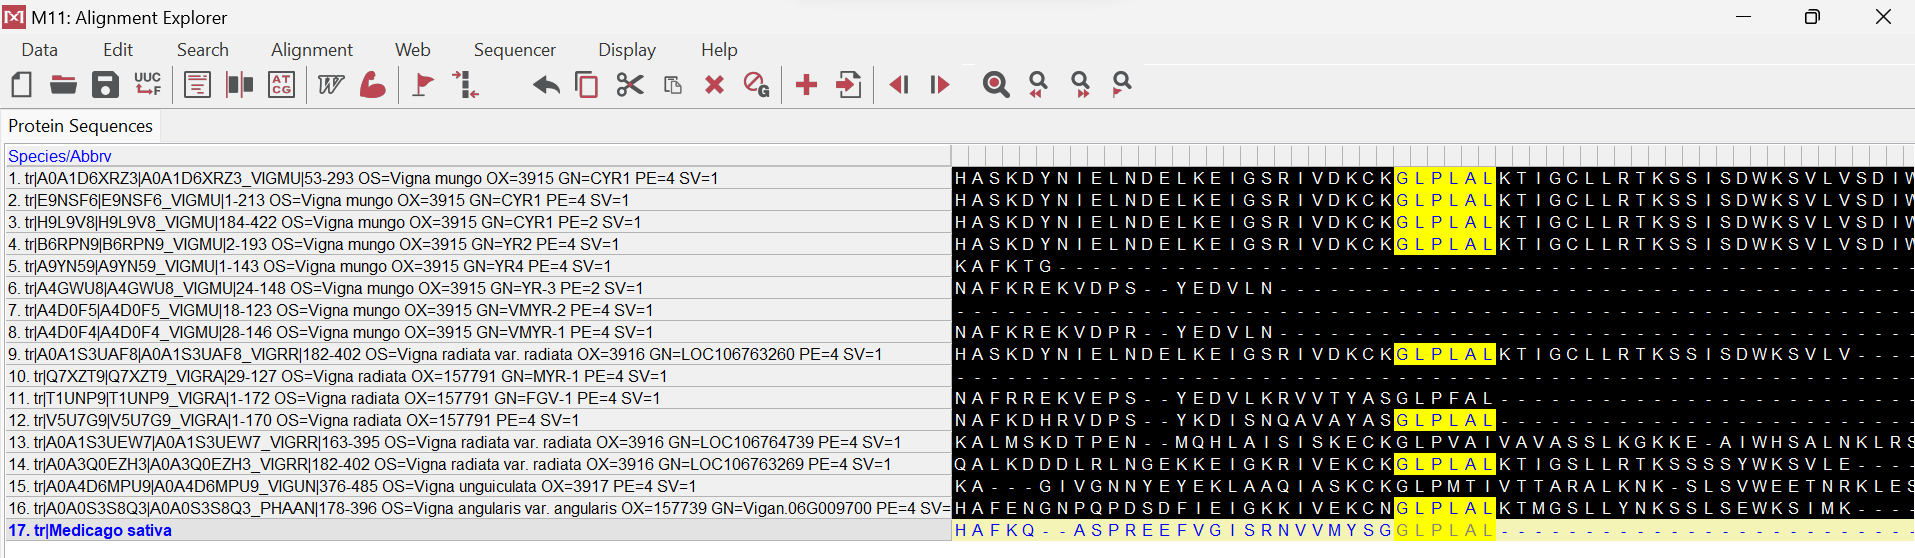


**Figure S3** Identification of conserved motifs within R protein domains. MUSCLE alignment was performed on collected accessions to verify the presence of conserved motifs. For the NB-ARC family, the P-Loop motif (A) and the terminal GLPLAL motif (B) are highlighted in yellow.


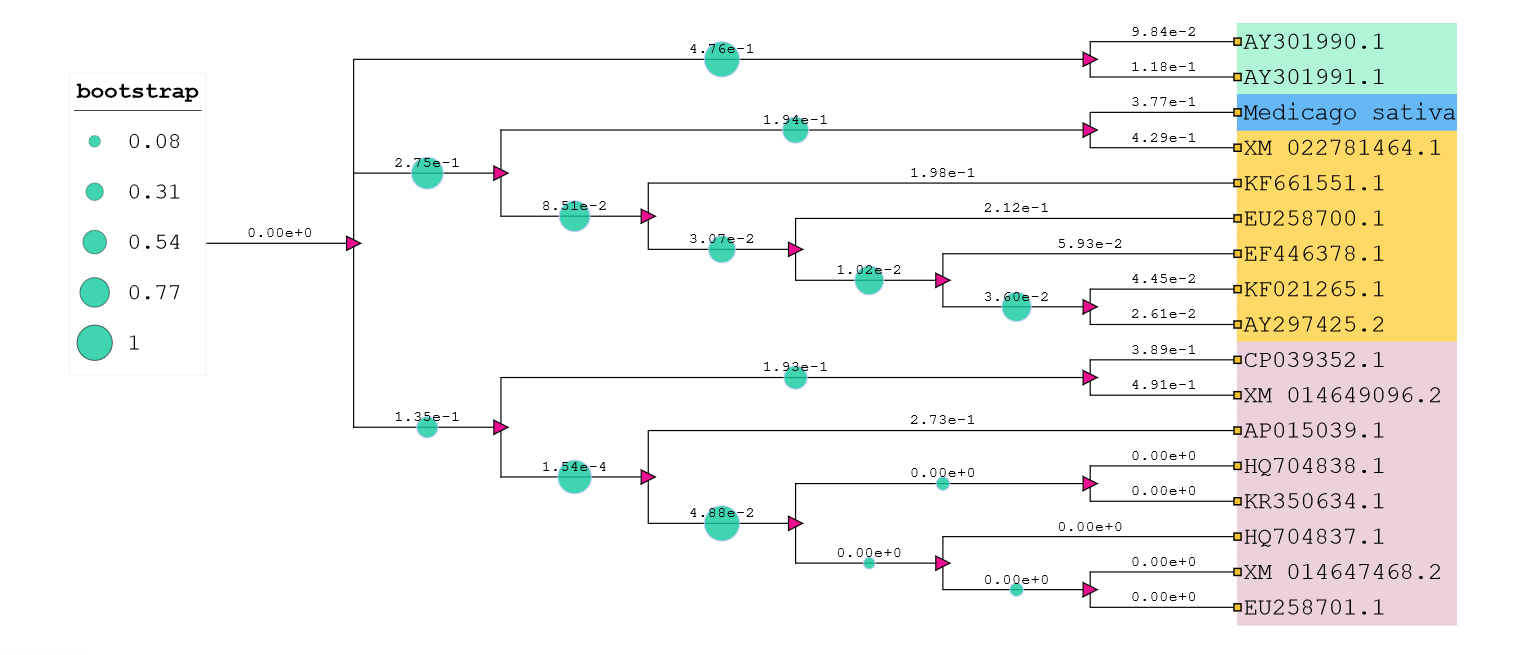


**Figure S4** Identification of diversity in conserved domain sequences among functionally similar R proteins. Phylogenetic analysis was performed on the nucleotide sequences of collected NB-ARC domain R protein accessions to visualize evolutionary relationships and clustering patterns. The dendrogram highlights variations among functionally similar R proteins, showing limited sequence similarity within conserved domains across three major clades. Medicago sativa served as the reference group.

**A)**


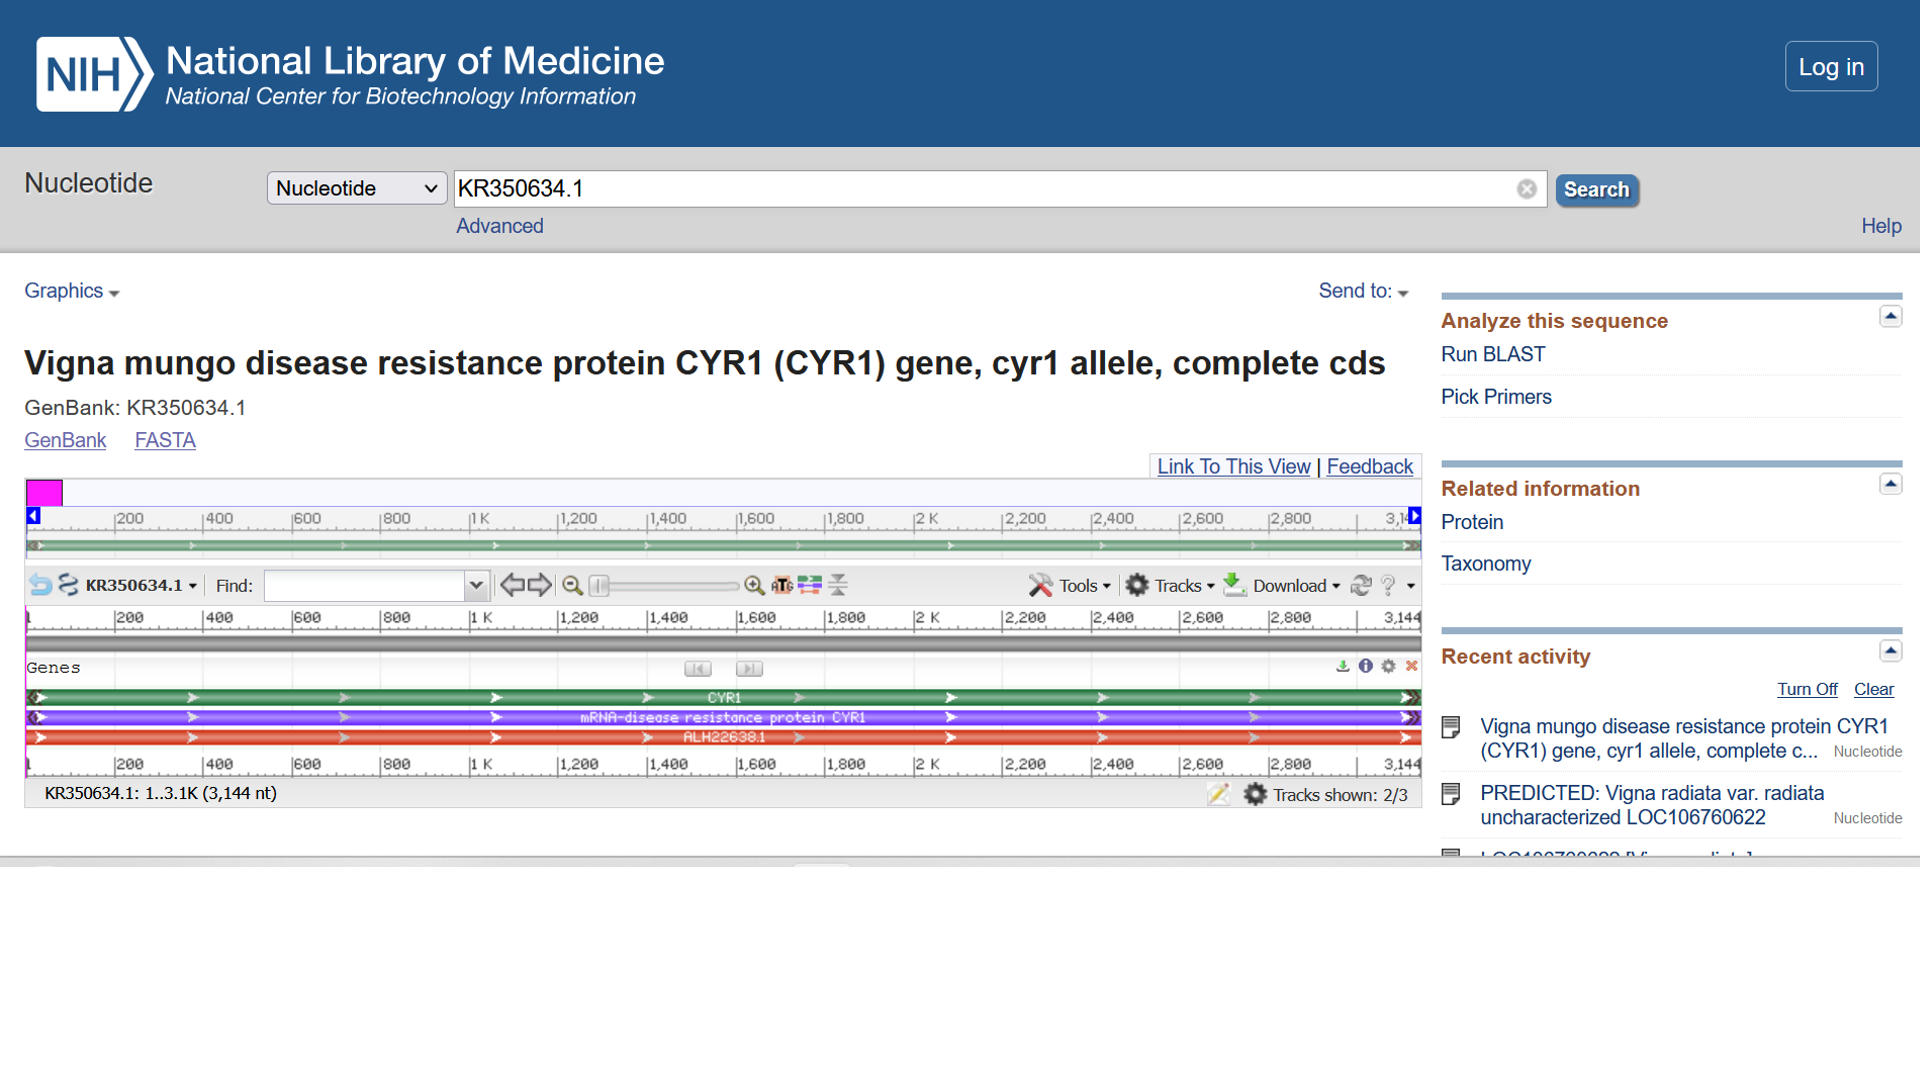


**B)**


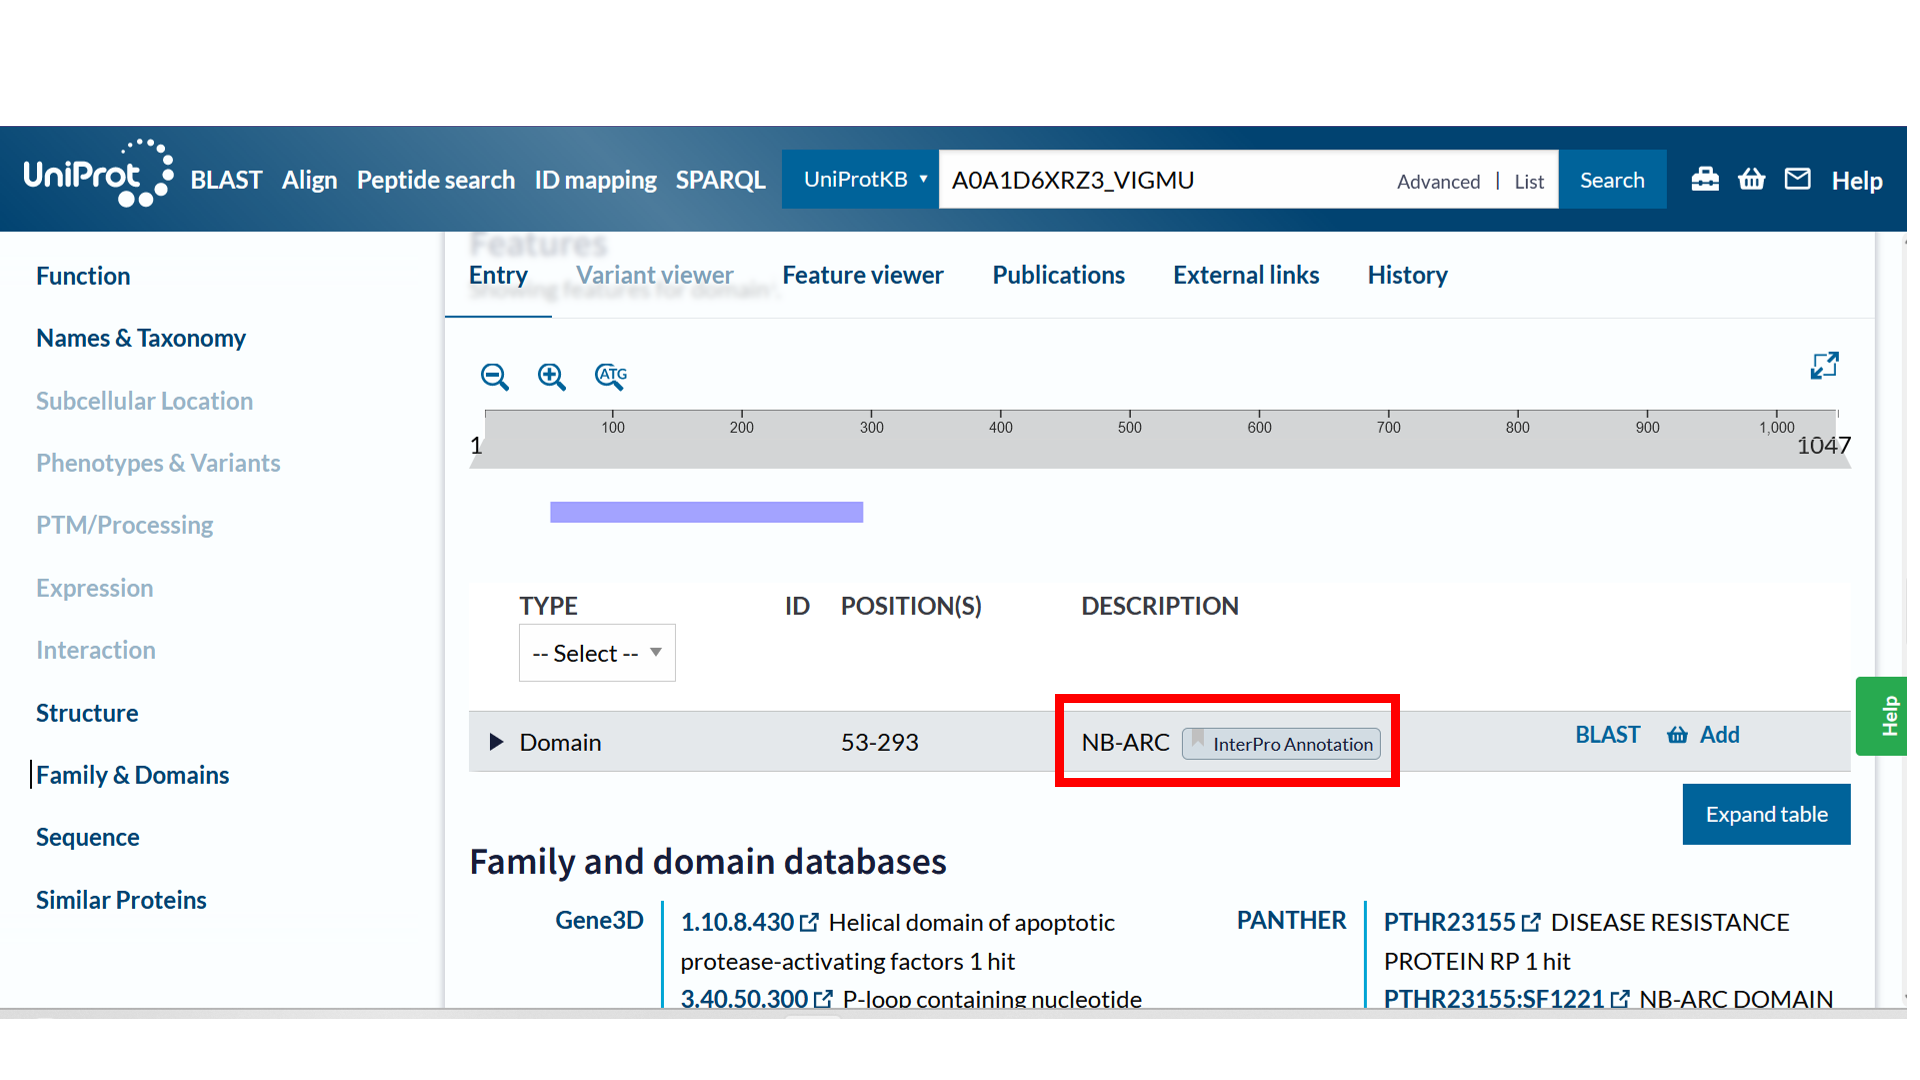


**Figure S5** Database selection for identifying specific domains within the R protein. (A) The NCBI database does not provide domain information for the R protein (A0A1D6XRZ3_VIGMU), while (B) the UniProt database shows the domain position for the same R protein.


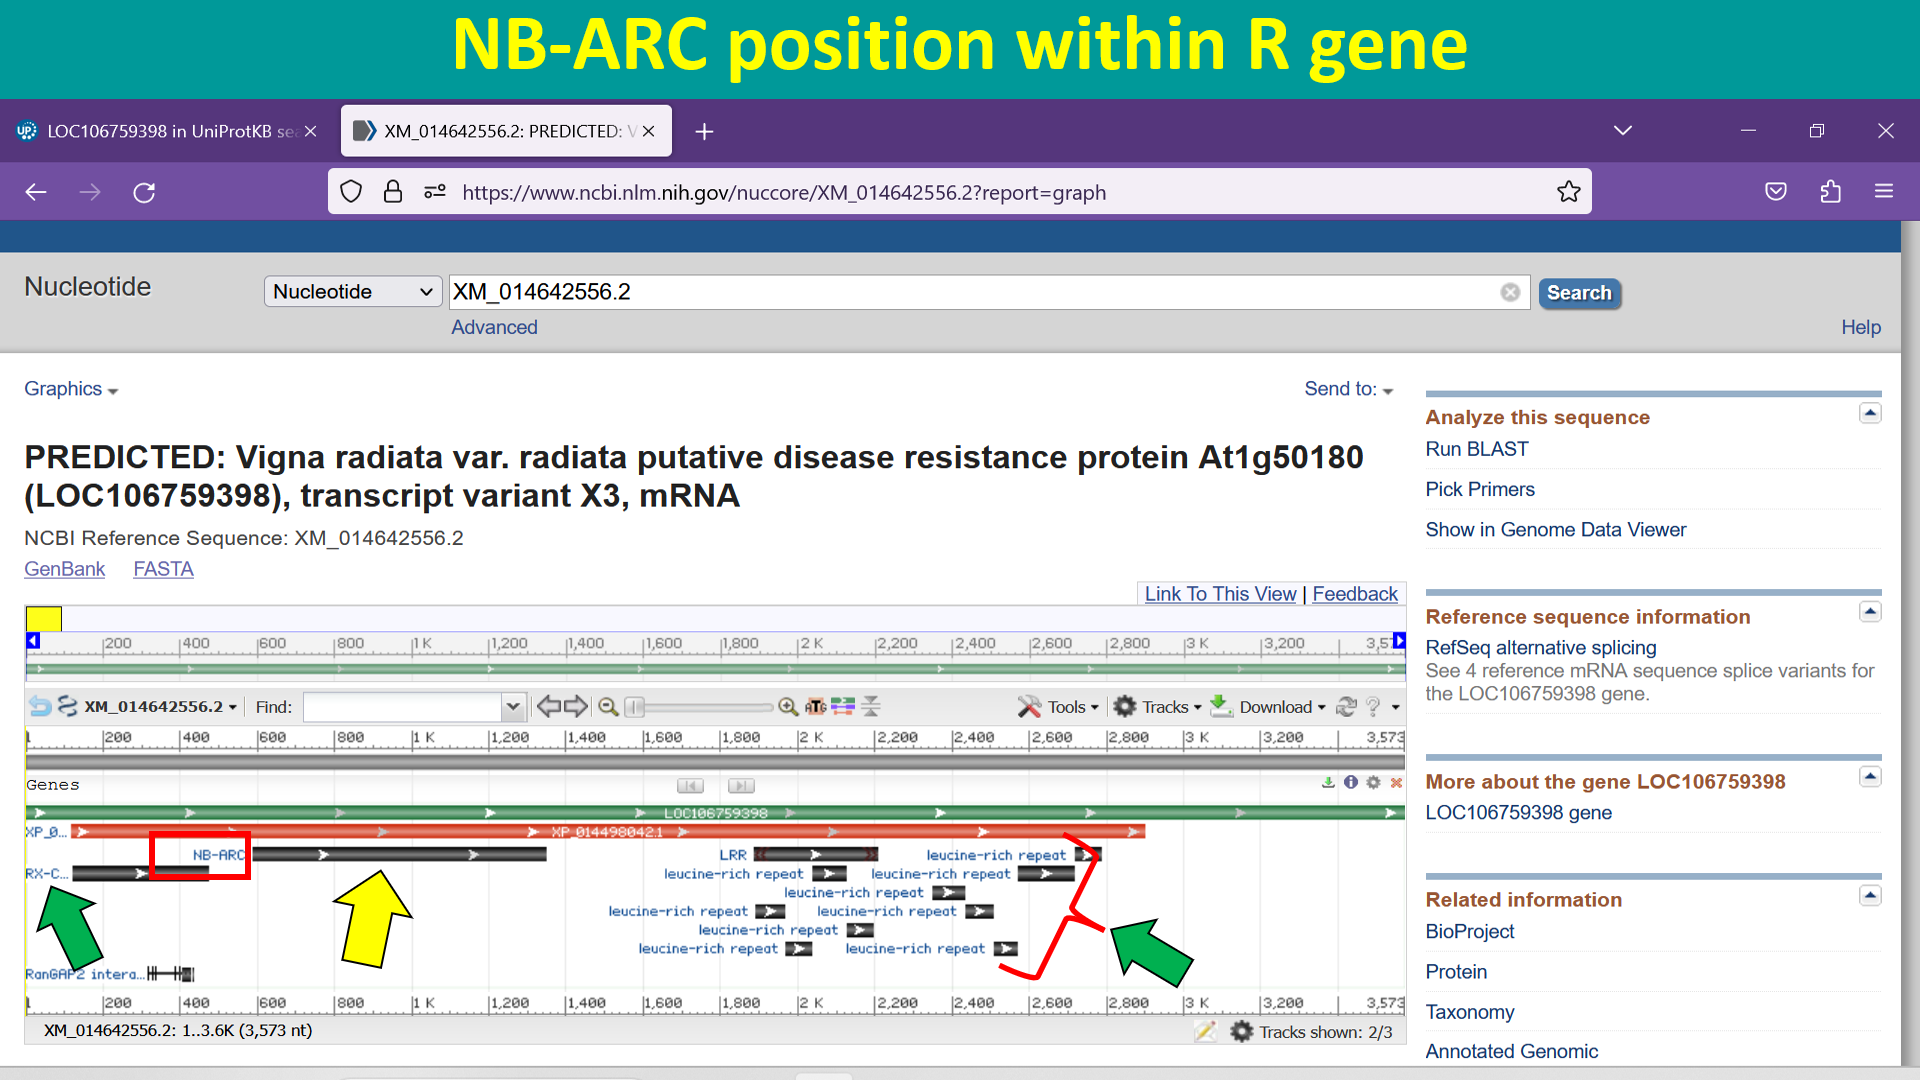


**Figure S6** Graphical representation of the R gene (LOC106759398) in the NCBI database. The NB-ARC domain is indicated by the yellow arrow, while other domains are highlighted with the green arrow.


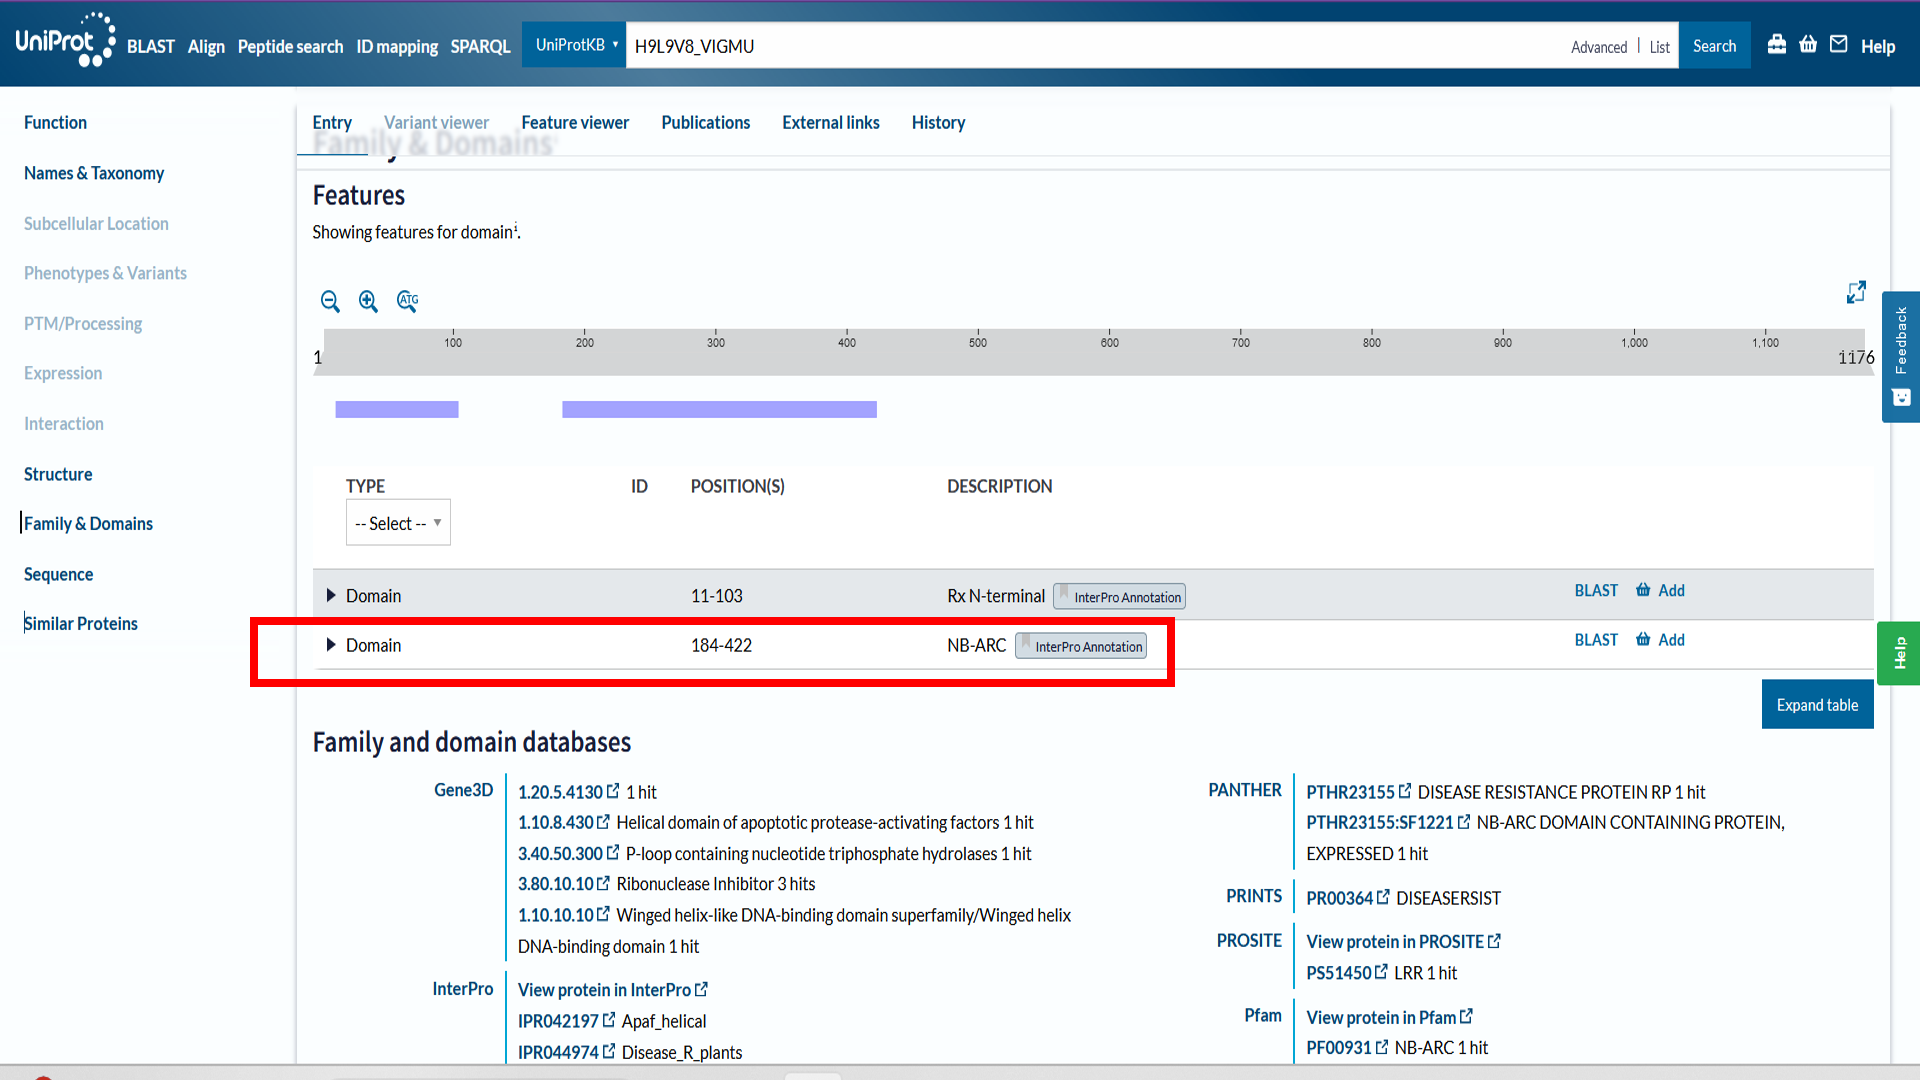


**Figure S7** Identification of the NB-ARC domain position within the CYR1 R protein in the UniProtKB database.


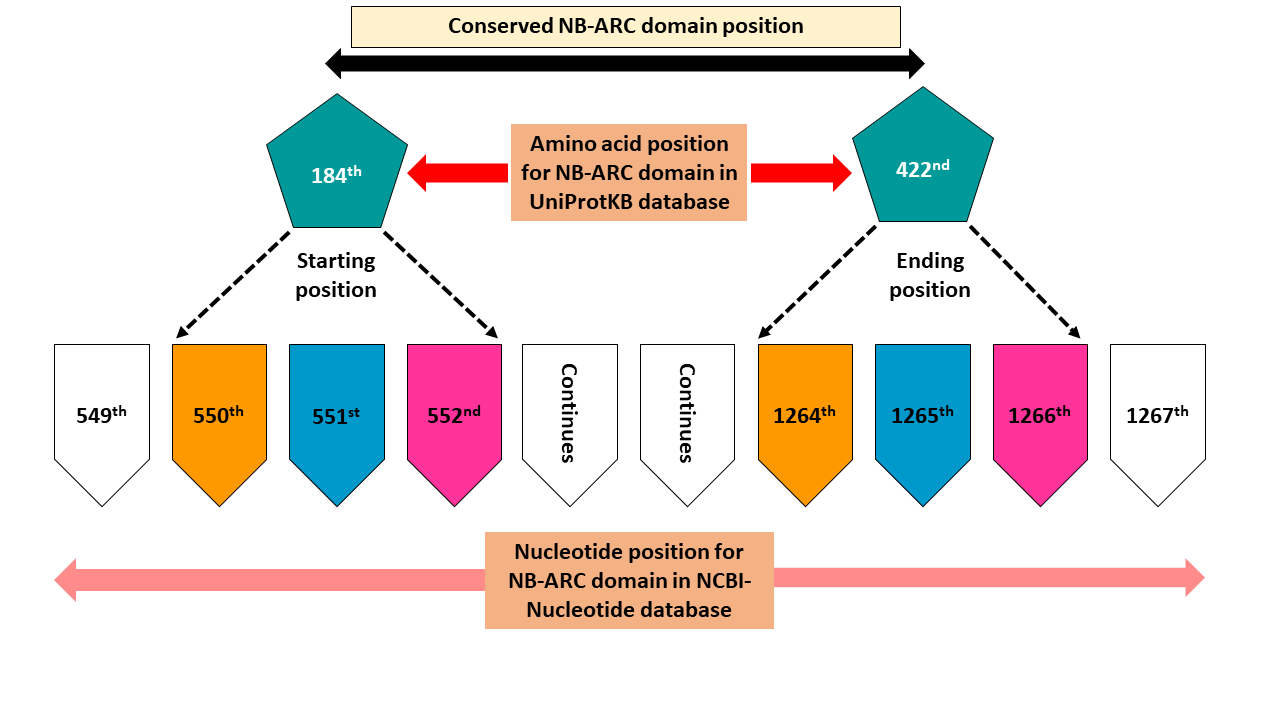


**Figure S8** Accurate identification of nucleotide coordinates corresponding to amino acid positions (184 to 422) for the NB-ARC R protein (H9L9V8_VIGMU) from the UniProtKB database.

**A)**

**
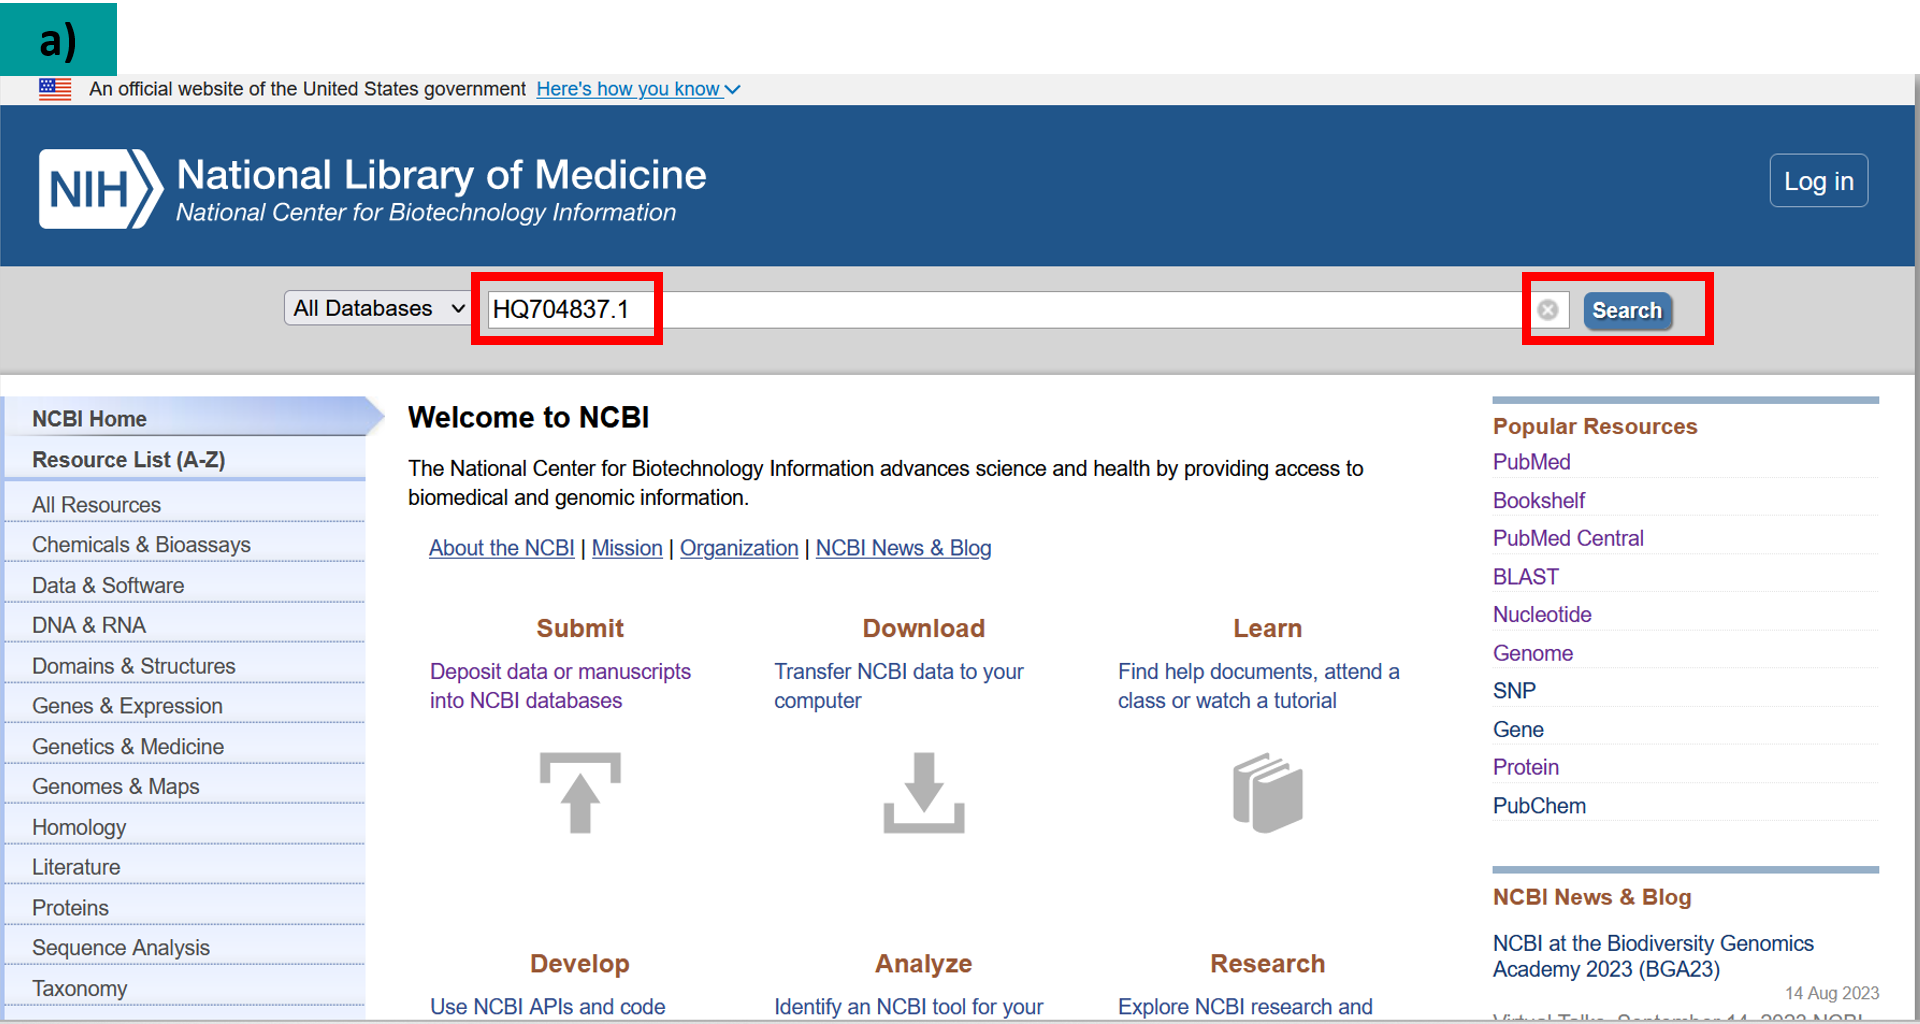
**

**
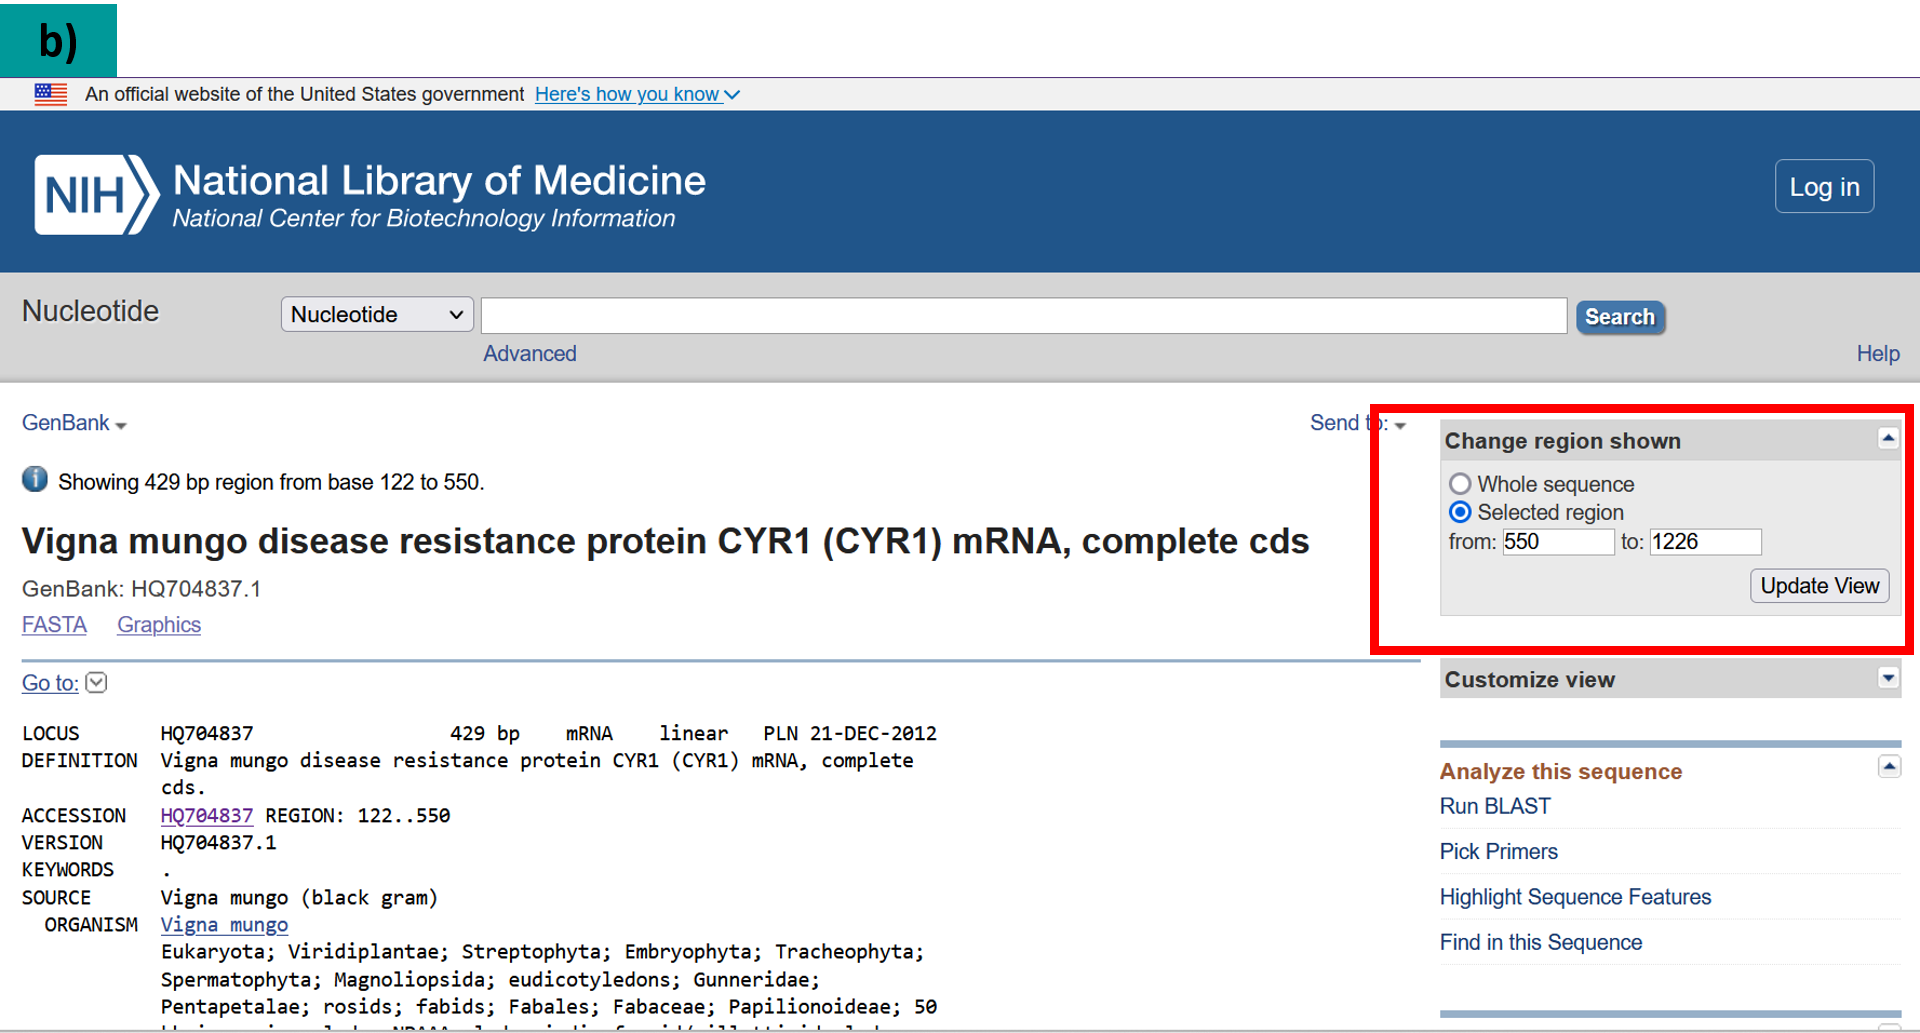
**

**B)**

**C)**

**
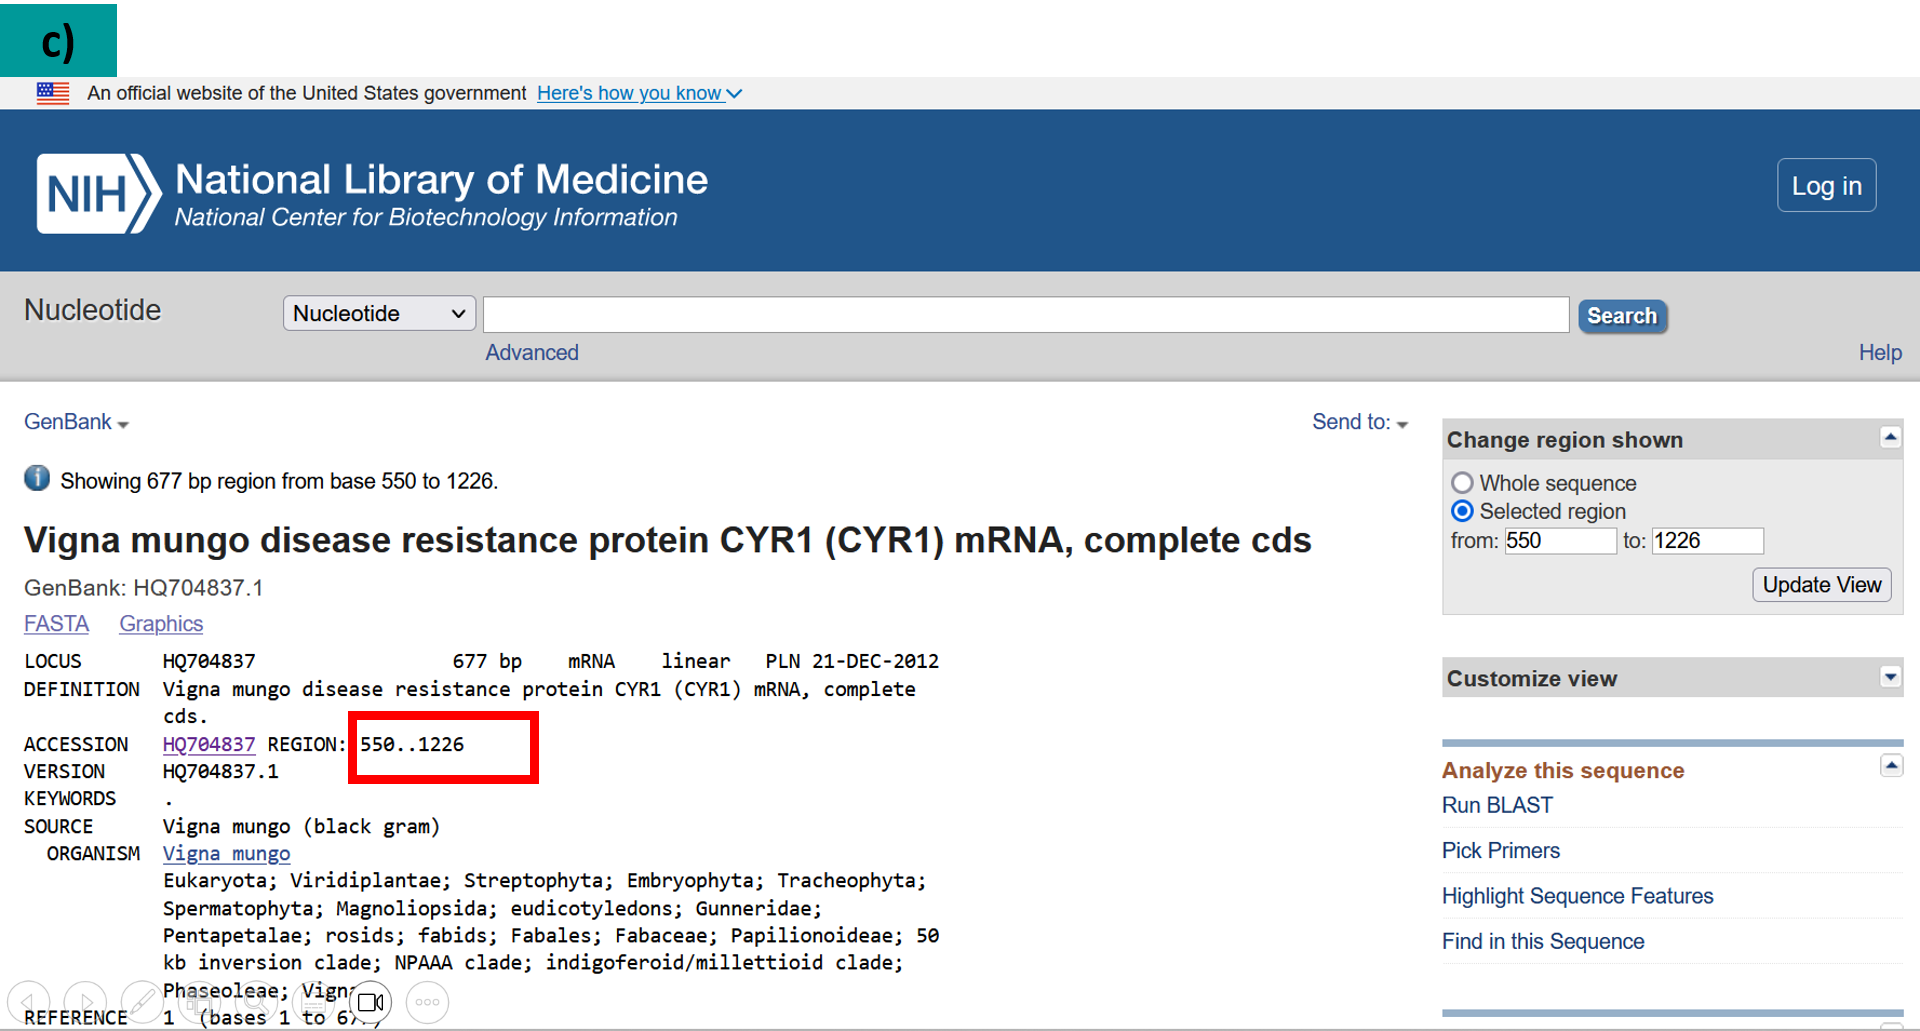
**

**Figure S9** Determining the nucleotide range for the R gene (HQ704837.1) in the NCBI-Nucleotide database. (A) The "Change Region Shown" tool was used, accessed via the top-right menu. (B) Coordinates were set, and (C) the "Update View" function was selected to display the precise nucleotide range.

**A)**


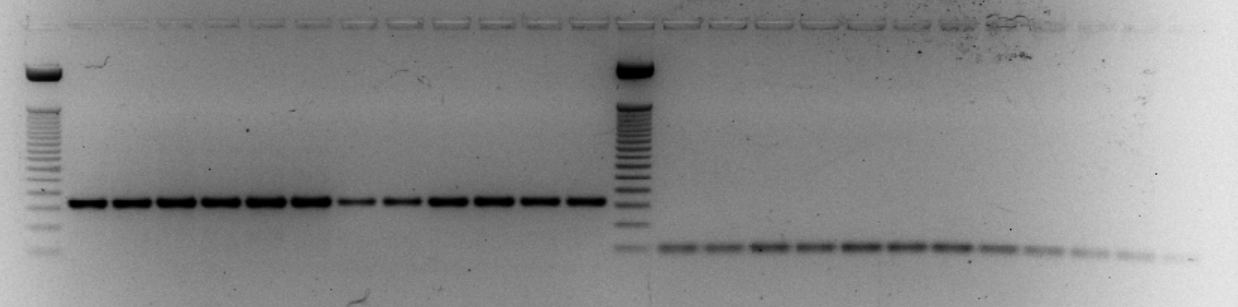


**NB-ARC_1**

**NB-ARC_2**

**54**

**55**

**56**

**57**

**58**

**59**

**60**

**61**

**62**

**63**

**64**

**50bp Ladder**

**65**


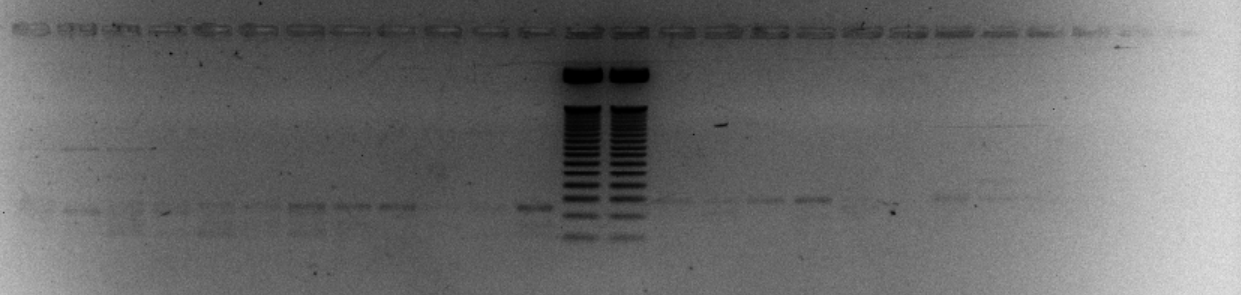


**NB-ARC_3**

**NB-ARC_4**

**B)**


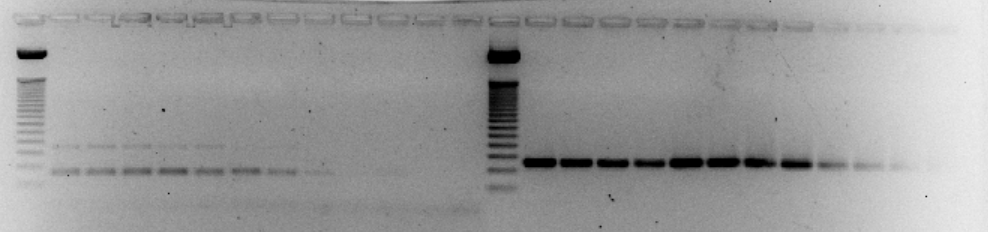


**NB-ARC_5**

**NB-ARC_6**

**C)**


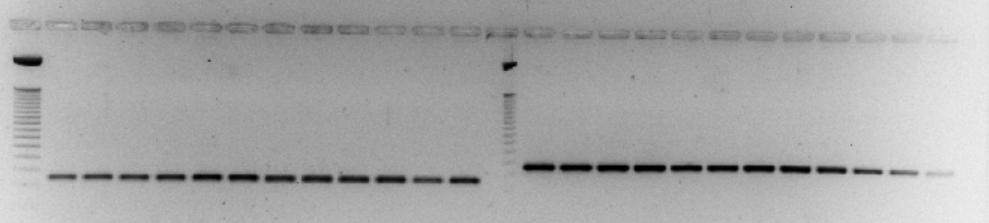


**NB-ARC_7**

**NB-ARC_8**

**D)**


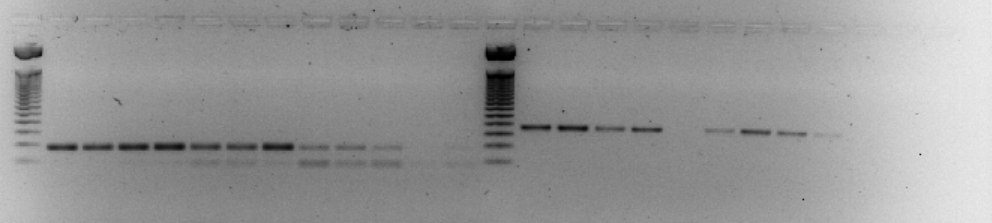


**NB-ARC_9**

**NB-ARC_10**

**E)**


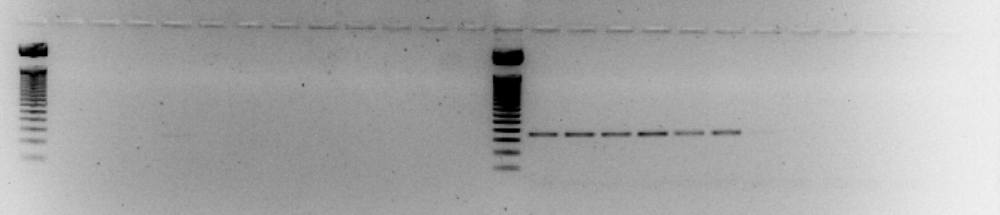


**NB-ARC_11**

**NB-ARC_12**

**F)**


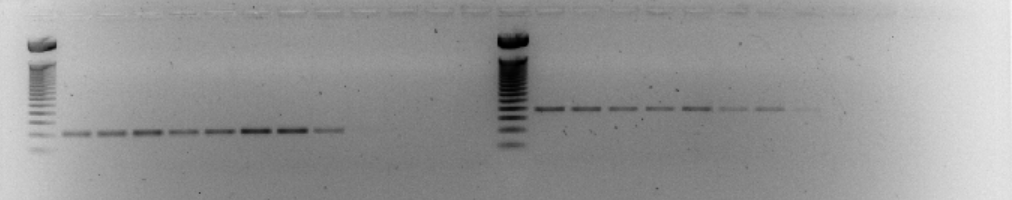


**NB-ARC_13**

**NB-ARC_15**

**G)**


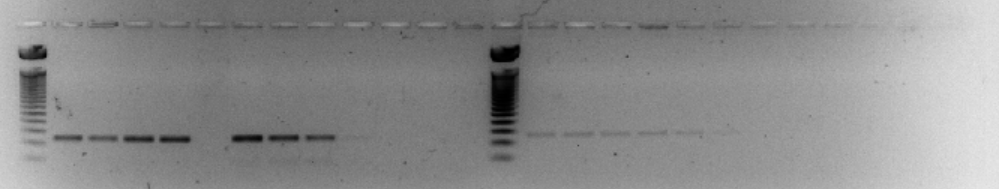


**NB-ARC_17**

**NB-ARC_19**

**H)**

**Figure S10** Optimization of designed PDS qPCR primers using gradient PCR (A-H). The yellow arrow highlights the annealing temperature range (54 - 65°C) tested for each primer pair.


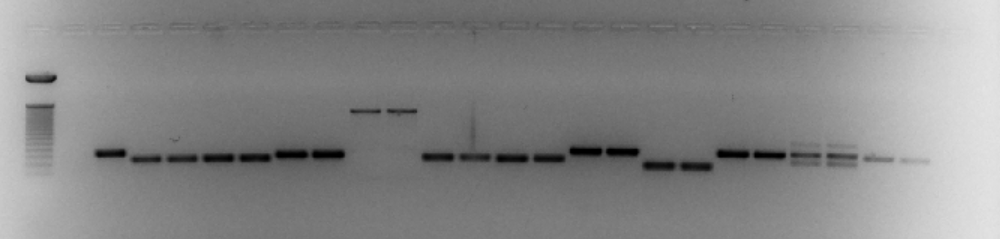


**50bp**

**N1**

**N2**

**N3**

**N4**

**N5**

**N6**

**N7**

**N8**

**N9**

**N10**

**Mash1-1**

**N11**

**N12**

**E**

**A)**

**B)**


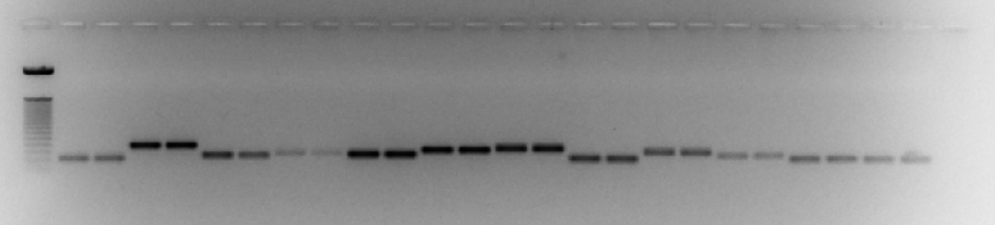


**N13**

**N15**

**N17**

**N19**

**50bp**


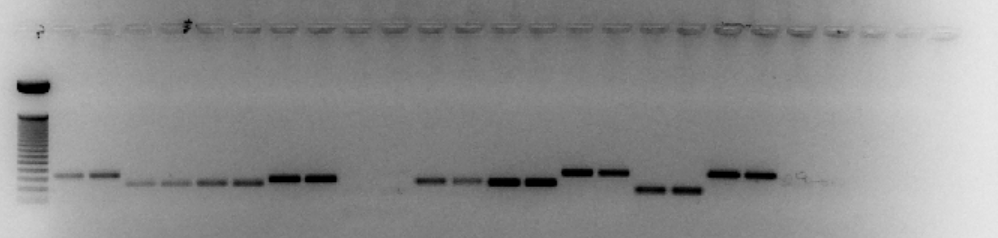


**KUG253**

**50bp**

**N1**

**N2**

**N3**

**N4**

**N5**

**N6**

**N7**

**N8**

**N9**

**N10**

**N11**

**N12**

**E**

**C)**

**D)**


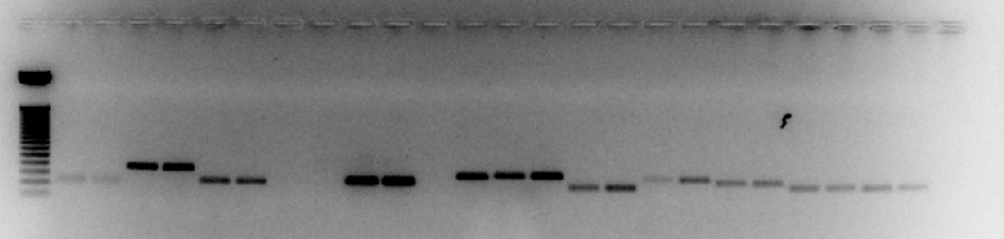


**N15**

**N13**

**N17**

**N19**

**50bp**

**E)**


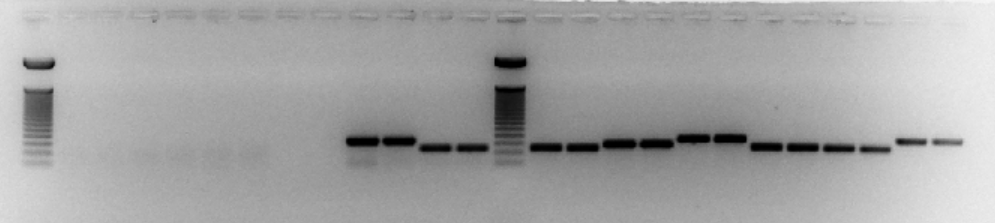


**N1**

**N2**

**N3**

**ML818**

**50bp**

**N4**

**N5**

**N6**

**F)**


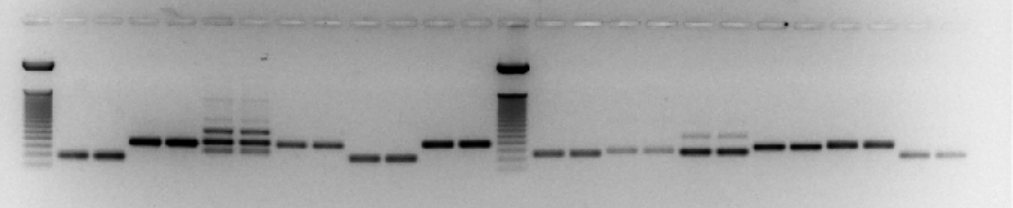


**N9**

**N8**

**N10**

**N12**

**N7**

**N17**

**N19**

**50bp**

**N11**

**50bp**

**N13**

**N15**

**G)**


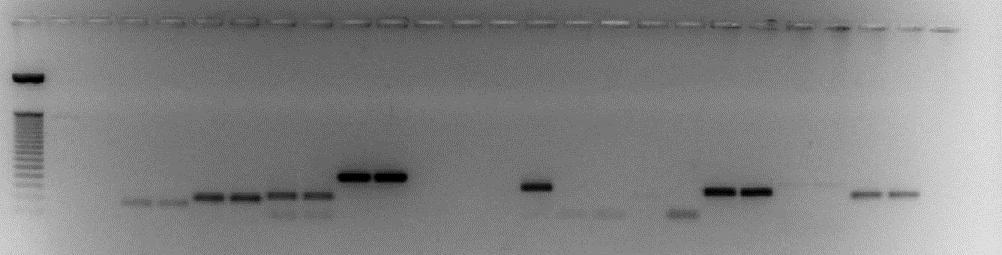


**E**

**SML1082**

**N1**

**N2**

**N3**

**N4**

**N5**

**N6**


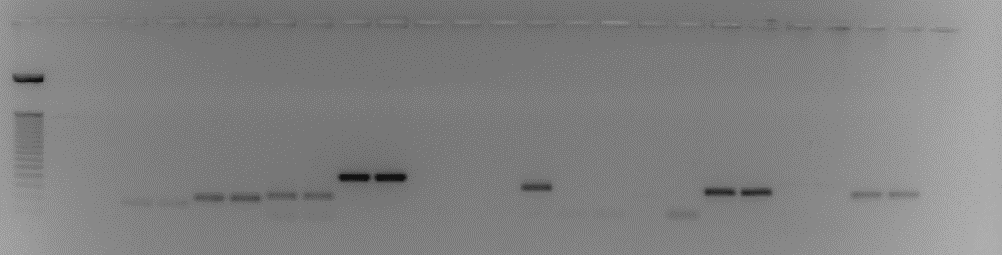


**50bp**

**H)**


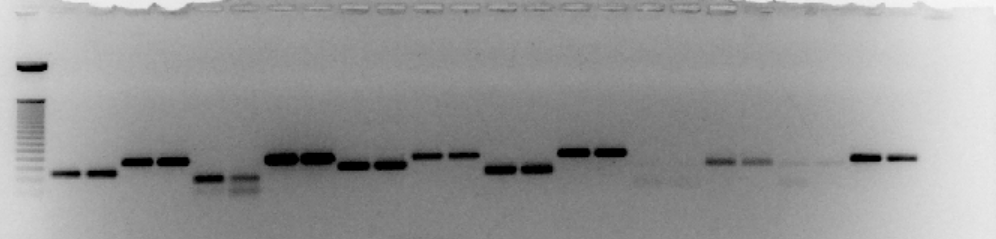


**N7**

**N8**

**N10**

**N11**

**N12**

**N13**

**N15**

**N17**

**N19**

**N9**

**50bp**


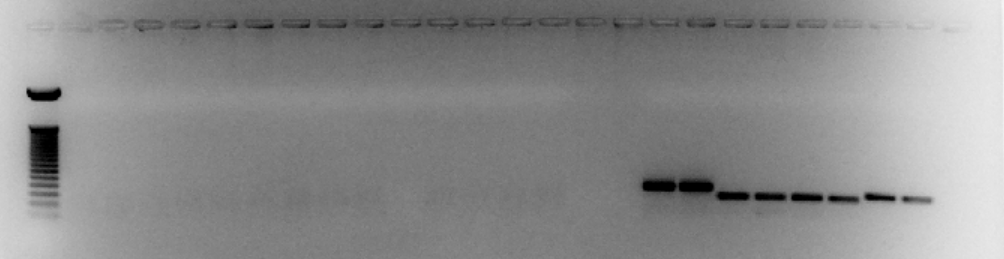


**N1**

**N2**

**N3**

**SML1827**

**E**

**N4**

**I)**


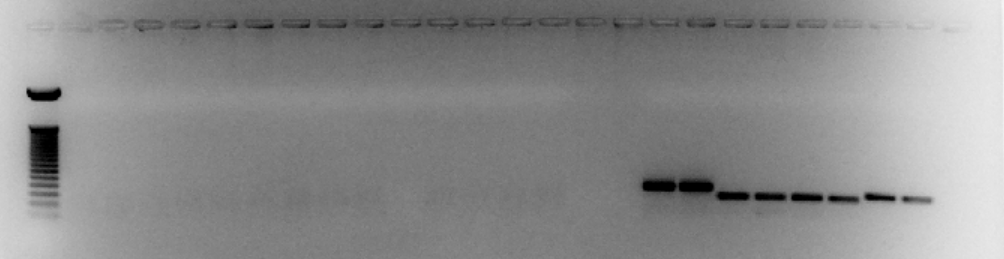


**50bp**


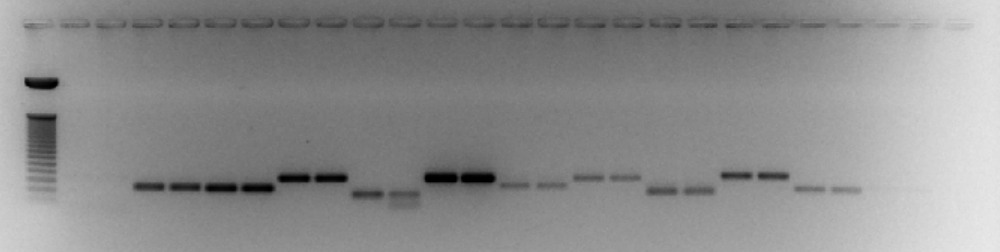


**N5**

**N6**

**N7**

**N8**

**N9**

**N10**

**N11**

**N12**

**N13**

**N15**

**N17**

**E**

**N19**

**50bp**

**J)**

**K)**


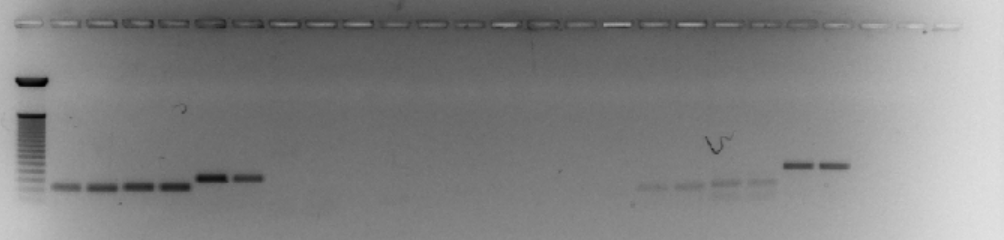


**N1**

**N2**

**N3**

**N4**

**E**

**RBL35**


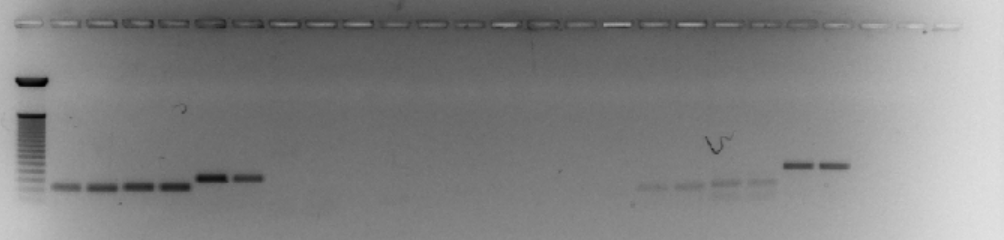


**50bp**


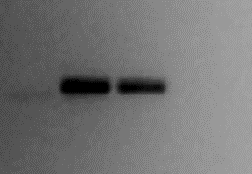

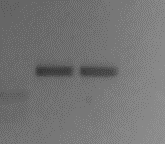


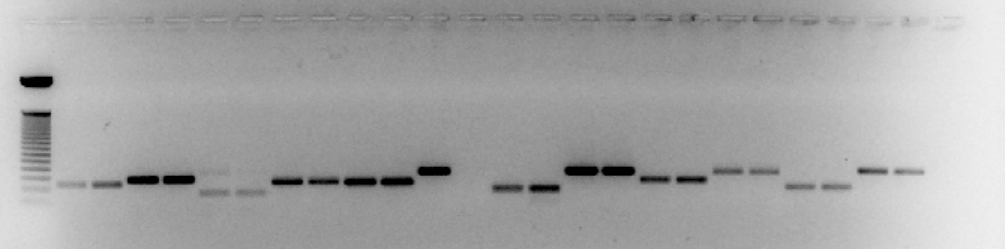


**N5**

**N6**

**N7**

**N8**

**N9**

**N10**

**N11**

**N12**

**N13**

**N15**

**N17**

**N19**

**E**

**50bp**

**L)**

**Figure S11** Validation of designed PDS qPCR primers through endpoint PCR (A-L) with an optimized annealing temperature of 57°C, using six different *Vigna* genotypes (Mash1-1, KUG253, ML818, SML1082, SML1827, RBL35). N = NB-ARC qPCR primers; E = Empty well.
