# Supplementary material
Source: Research Square preprint supplement (doi:10.21203/rs.3.rs-5891448/v1)
Supplement: Supplementary file 2 [file 6eeecd1b29ec77d90c525baf.docx]

**Additional File 2: Parameters for Optimum qPCR Primer Design**

qPCR primers were designed using Primer3Web version 4.1.0 (<https://primer3.ut.ee/>), following these steps:

1. Access Primer3Web via <https://primer3.ut.ee/>.
2. Choose "generic" in task for primer selection.
3. Keep "Template masking" default and set "Primer failure rate cutoff" below 0.1.
4. Paste the FASTA sequence into the "Sequence Input" box.
5. Select "Pick left primer" and "Pick right primer"; deselect "Pick hybridization probe."
6. Name the output (e.g., qPCR primer).
7. Use the general conditions below, leaving other parameters at default.
8. Set "Maximum library mispriming" to 12 and "Pair max library mispriming" to 24.
9. Click "Pick Primer."

**General Primer Picking Conditions:**

- **Primer Size:** Designed to be 18–24 bases for optimal PCR performance, considering assay specificity and Tm (Wu et al. 1991).
- **Primer Tm:** Set between 56°C and 63°C (target 60°C), with a maximum 5°C difference between forward and reverse primers.
- **Thermodynamic Model:** The SantaLucia model (1998) was used for precise Tm predictions, incorporating mismatches and terminal base pairs.
- **Primer GC Content:** Maintained at 50% (range 45%–60%) for efficient annealing and amplification (Dieffenbach et al. 1993).
- **Product Size Ranges:** Amplicons were set between 80 and 150 bp for optimal efficiency and accurate quantification (Livak and Schmittgen 2001).
- **Number to Return:** Designed at least 10 primer sets to increase the likelihood of finding suitable primers.
- **Maximum 3' Stability:** Set ΔG value of 9 for the last 5 bases to enhance primer-template interaction.
- **GC Clamp:** Incorporated 1–2 G/C residues at the 3' end to ensure stability and prevent non-specific binding (Sheffield et al. 1989; Kwok et al. 1990).
- **Divalent Cation Concentration:**

**KCl:** Default set to 50 mM for optimal PCR unless experimental needs required adjustments.

**Mg²⁺:** Adjusted to 3-6 mM in line with GoTaq® qPCR system (Promega) from the default 1.5 mM. (adjust according to the preferred product).

- **Objective Function Penalty Weights:** For primers: Size (Lt = 1, Gt = 1), Tm (Lt = 1, Gt = 1), Self Complementarity = 3, 3' Self Complementarity = 3, #N's = 2.
  For primer pairs: Product Tm (Lt = 1, Gt = 1), Any Complementarity = 3, 3' Complementarity = 3, Tm Difference = 2.

**Other Parameters:**

- **Primer Ta:** Optimal Ta was identified using gradient PCR (54°C–65°C).
- **Repeats:** Limited dinucleotide repeats to four and avoided G/C repeats over three to prevent mispriming.
- **Runs:** Excluded runs (e.g., TAAAAAGC) to ensure specificity and accuracy.
- **Minimizing Primer Dimer Formation:** Used OligoAnalyzer and mfold software to assess secondary structures and minimize dimer formation, enhancing PCR efficiency.
