# Supplementary material
Source: Research Square preprint supplement (doi:10.21203/rs.3.rs-5891448/v1)
Supplement: Supplementary file 3 [file a94e36bbddce0b7810c22982.xlsx]

## Sheet: NB-ARC
Table S1 List of candidate NB-ARC R genes utilized for PDS qPCR primer designing
NCBI Nucleotide Databse											UniProtKB Databse
S.No	Primer Series	mRNA GenBank ID	Protein GenBank ID	Nucleotide GenBank ID	Protein GenBank ID	Candidate Gene	Crop	Species	Domain		UniProtKB Entry	Date of creation	Candidate Gene	Amino Acid	Crop	Species	Protein Family	Domain	Position	Other Domains	Position	Motif	Position
1	NB-ARC_1			KR350634.1	ALH22638.1	CYR1	Black gram	Vigna mungo	-		A0A1D6XRZ3_VIGMU	2017	CYR1	1047	Black gram	Vigna mungo	NB-ARC family	NB-ARC	53-293
2	NB-ARC_2			HQ704838.1	ADU57969.1	CYR1	Black gram	Vigna mungo	non-TIR-NBS-LRR		E9NSF6_VIGMU	2011	CYR1	411	Black gram	Vigna mungo	NB-ARC family	NB-ARC	1-213
3	NB-ARC_3			HQ704837.1	ADU57957.1	CYR1	Black gram	Vigna mungo	non-TIR-NBS-LRR		H9L9V8_VIGMU	2012	CYR1	1176	Black gram	Vigna mungo	NB-ARC family	NB-ARC	184-422	Rx N-terminal	11-103
4	NB-ARC_4			EU258701.1	ABY27014.1	YR2	Black gram	Vigna mungo	CC-NB-LRR		B6RPN9_VIGMU	2008	YR2	311	Black gram	Vigna mungo	NB-ARC family	NB-ARC	2-193
5	NB-ARC_5			EU258700.1	ABY27013.1	YR4	Black gram	Vigna mungo	NBS-ARC		A9YN59_VIGMU	2008	YR4	152	Black gram	Vigna mungo	NB-ARC family	NB-ARC	1-143
6	NB-ARC_6			EF446378.1	ABO21765.1	YR3	Black gram	Vigna mungo	NB-ARC		A4GWU8_VIGMU	2007	YR-3	152	Black gram	Vigna mungo	NB-ARC family	NB-ARC	24-148
7	NB-ARC_7			AY301991.1	AAQ75745.1	VMYR-2	Black gram	Vigna mungo	NB-ARC		A4D0F5_VIGMU	2007	VMYR-2	130	Black gram	Vigna mungo	NB-ARC family	NB-ARC	18-123
8	NB-ARC_8			AY297425.2	AAQ63168.1	VMYR-1	Black gram	Vigna mungo	NB-ARC		A4D0F4_VIGMU	2007	VMYR-1	148	Black gram	Vigna mungo	NB-ARC family	NB-ARC	28-146
9	NB-ARC_9	XM_014647468.2	XP_014502954.1				Green gram	Vigna radiata var. radiata	-		A0A1S3UAF8_VIGRR	2017	LOC106763260	1177	Mung bean	Vigna radiata var. radiata	NB-ARC family	NB-ARC	182-402	Rx N-terminal	11-103
10	NB-ARC_10			AY301990.1	AAP57566.1	MYR-1	Green gram	Vigna radiata	NB-ARC		Q7XZT9_VIGRA	2003	MYR-1	129	Mung bean	Vigna radiata	NB-ARC family	NB-ARC	29-127
11	NB-ARC_11			KF021265.1	AGT79953.1	FGV-1	Green gram	Vigna radiata	NBS-LRR		T1UNP9_VIGRA	2013	FGV-1	172	Mung bean	Vigna radiata	NB-ARC family	NB-ARC	1-172
12	NB-ARC_12			KF661551.1	AHB72719.1	FGV-3	Green gram	Vigna radiata	NBS-LRR		V5U7G9_VIGRA	2014	-	170	Mung bean	Vigna radiata	NB-ARC family	NB-ARC	1-170
13	NB-ARC_13	XM_014649096.2	XP_014504582.1				Green gram	Vigna radiata var. radiata	-		A0A1S3UEW7_VIGRR	2017	LOC106764739	1945	Mung bean	Vigna radiata var. radiata	NB-ARC family	NB-ARC	163-395
14	NB-ARC_15	XM_022781464.1	XP_022637185.1				Green gram	Vigna radiata var. radiata	-		A0A3Q0EZH3_VIGRR	2019	LOC106763269	1131	Mung bean	Vigna radiata var. radiata	NB-ARC family	NB-ARC	182-402	Rx N-terminal	11-103
15	NB-ARC_17	CP039352.1	QCE02794.1				Cowpea	Vigna unguiculata	-		A0A4D6MPU9_VIGUN	2019	DEO72_LG8g809	5522	Cowpea	Vigna unguiculata	NB-ARC family	NB-ARC	166-282; 376-485			Coiled coil	28-62
16	NB-ARC_19	AP015039.1	BAT89205.1				Adzuki bean	Vigna angularis var. angularis	-		A0A0S3S8Q3_PHAAN	2016	VIGAN_06009700	1062	Adzuki bean	Vigna angularis var. angularis	NB-ARC family		178-396	Rx N-terminal	11-102
