# Supplementary material
Source: Research Square preprint supplement (doi:10.21203/rs.3.rs-5891448/v1)
Supplement: Supplementary file 4 [file ebbd9fc953f5cd2233b4a688.docx]

**Table S2** List of degenerate primers used in diverse crops

| **S. No.** | **Crop** | **Reference** |
| --- | --- | --- |
|  | *Arabidopsis* | Aarts et al. 1991 |
|  | Soybean | Kanazin et al. 1996; Yu et al. 1996; Yamamoto and Knap, 2001 |
|  | Potato | Leister et al. 1996 |
|  | Avena species | Leister et al. 1996; Irigoyen et al. 2006 |
|  | Rice | Mago et al. 1999 |
|  | Lettuce | Shen et al. 1998 |
|  | Maize | Collins et al. 1998 |
|  | Pepper | Pflieger et al. 1999 |
|  | *Medicago* species | Campbell 2003 |
|  | Sugar beet | Hunger et al. 2003 |
|  | Cotton | Tan et al. 2003 |
|  | Pepper | Egea-Gilabert et al. 2003 |
|  | Cocoa | Lanaud et al. 2004 |
|  | Coffee trees, Western white pine | Liu et al. 2004 |
|  | *Vigna* species | Basak et al. 2005 |
|  | Chickpea | Palomino et al. 2006; Zhou et al. 2019 |
|  | Fabaceae | Pal et al. 2007 |
|  | *Vitis* species | Mahanil et al. 2007 |

**Table S3** List of PDS qPCR primers designedfrom diverse *Vigna* accessions

| **S. No.** | **qPCR Primers** | **Accessions selected for primer design** | **Left primer** | **Right primer** | **Product size** |
| --- | --- | --- | --- | --- | --- |
| **NB-ARC domain-specific qPCR primers** | | | | | |
| **1** | **NB-ARC_1** | KR350634 | GCTCACATCTGAGACCGACA | TCGAAATGATCGGAAACACA | 162 |
| **2** | **NB-ARC_2** | HQ704838 | AATTGCGAGAGGATGAATGC | ACCCCTTGCACTTATCAACG | 120 |
| **3** | **NB-ARC_3** | HQ704837 | GCAATTGCGAGAGGATGAAT | ACCCCTTGCACTTATCAACG | 122 |
| **4** | **NB-ARC_4** | EU258701 | ACCAAAGACGAGACGAATGG | CTCTCGCAATTGCTTTAGGC | 143 |
| **5** | **NB-ARC_5** | EU258700 | AAACAAACATGGGCTGGAAC | CCAGTGCCTGTAACTGCTCA | 179 |
| **6** | **NB-ARC_6** | EF446378 | AGGCTGAGGCGAAAGAAAGT | TCGTCCCGAGTGGTAATGAT | 128 |
| **7** | **NB-ARC_7** | AY301991 | CCAAACCAATCAGCTCTTCC | AGTTGGCAAGAAGGAGCATC | 125 |
| **8** | **NB-ARC_8** | AY297425 | CCTCCAGAGCCTCCTTCTTT | CCAAACCAATCAGATCTTCCA | 180 |
| **9** | **NB-ARC_9** | XM_014647468 | GCTCACATCAGAAACCGACA | CATGTTGGACGAGTGTGGTC | 92 |
| **10** | **NB-ARC_10** | AY301990 | CCAAACCAATCAGATCTTCCA | ACCTCCAGACCGTCCTTCTT | 181 |
| **11** | **NB-ARC_11** | KF021265 | GGGGAGTAGGCAAAACAACA | AAGAAGGACGGTTTGGAGGT | 137 |
| **12** | **NB-ARC_12** | KF661551 | TCCATTGCAGACCAATTTGA | TTCTTTCGGTGGAGCCTATG | 182 |
| **13** | **NB-ARC_13** | XM_014649096 | GGATTTGGCGATACCGTTTA | GATGCAATGCGTTGAAGTTG | 106 |
| **14** | **NB-ARC_14** | XM_022781464 | TGCCATCATCTTCTTTGCTG | CCTCCTCAATCTTTGGGTCA | 192 |
| **15** | **NB-ARC_15** | CP039352 | ATCGGTCTTCATGGGTTGAG | TGTCAGGGTTTTTGGTCACA | 124 |
| **16** | **NB-ARC_16** | AP015039 | TTGGATGATGTTTGGAACGA | CTTTTCTGATCGCATCGTGA | 135 |

**Table S4** Standardization of designed PDS qPCR primers through gradient PCR approach

| **Annealing temperature ranges (°C)** | | | | | | | | | | | | |
| --- | --- | --- | --- | --- | --- | --- | --- | --- | --- | --- | --- | --- |
| **qPCR Primers** | **54** | **55** | **56** | **57** | **58** | **59** | **60** | **61** | **62** | **63** | **64** | **65** |
| **NB-ARC qPCR primers** | | | | | | | | | | | | |
| **NB-ARC_1** | 54 | 55 | 56 | **57** | 58 | 59 | 60 | 61 | 62 | 63 | 64 | 65 |
| **NB-ARC_2** | 54 | 55 | 56 | **57** | 58 | 59 | 60 | 61 | 62 | 63 | 64 | 65 |
| **NB-ARC_3** | - | - | - | - | - | - | 60 | 61 | 62 | - | - | 65 |
| **NB-ARC_4** | 54 | 55 | 56 | **57** | - | - | - | - | - | - | - | - |
| **NB-ARC_5** | 54 | 55 | 56 | **57** | 58 | 59 | 60 | - | - | - | - | - |
| **NB-ARC_6** | 54 | 55 | 56 | **57** | 58 | 59 | 60 | 61 | - | - | - | - |
| **NB-ARC_7** | 54 | 55 | 56 | **57** | 58 | 59 | 60 | 61 | 62 | 63 | 64 | 65 |
| **NB-ARC_8** | 54 | 55 | 56 | **57** | 58 | 59 | 60 | 61 | 62 | 63 | 64 | 65 |
| **NB-ARC_9** | 54 | 55 | 56 | **57** | 58 | 59 | 60 | 61 | 62 | 63 | - | - |
| **NB-ARC_10** | 54 | 55 | 56 | **57** | - | - | 60 | 61 | - | - | - | - |
| **NB-ARC_11** | - | - | - | **57** | - | - | - | - | - | - | - | - |
| **NB-ARC_12** | 54 | 55 | 56 | **57** | 58 | 59 | - | - | - | - | - | - |
| **NB-ARC_13** | 54 | 55 | 56 | **57** | 58 | 59 | 60 | 61 | - | - | - | - |
| **NB-ARC_14** | 54 | 55 | 56 | **57** | 58 | 59 | 60 | - | - | - | - | - |
| **NB-ARC_17** | 54 | 55 | 56 | **57** | - | 59 | 60 | 61 | - | - | - | - |
| **NB-ARC_19** | 54 | 55 | 56 | **57** | 58 | - | - | - | - | - | - | - |

**Table S5** Validation of designed PDS qPCR primers in endpoint PCR

| **S. No.** | **Parental line** | ***Vigna sp.*** | **Disease response** | **qPCR Primers** | | | | | | | | | | | | | | | |
| --- | --- | --- | --- | --- | --- | --- | --- | --- | --- | --- | --- | --- | --- | --- | --- | --- | --- | --- | --- |
| NB-ARC_1 | NB-ARC_2 | NB-ARC_3 | NB-ARC_4 | NB-ARC_5 | NB-ARC_6 | NB-ARC_7 | NB-ARC_8 | NB-ARC_9 | NB-ARC_10 | NB-ARC_11 | NB-ARC_12 | NB-ARC_13 | NB-ARC_15 | NB-ARC_17 | NB-ARC_19 |
| **1** | **Mash1-1** | ***V. mungo*** | **Resistance** | Yes | Yes | Yes | Yes | Yes | Yes | Yes | Yes | Yes | Yes | Yes | Yes | Yes | Yes | Yes | Yes |
| **2** | **KUG253** | ***V. mungo*** | **Susceptible** | Yes | Yes | Yes | Yes | **NO** | Yes | Yes | Yes | Yes | Yes | **NO** | **NO** | Yes | Yes | Yes | **NO** |
| **3** | **ML818** | ***V. radiata*** | **Resistance** | Yes | Yes | Yes | Yes | Yes | Yes | Yes | Yes | Yes | Yes | Yes | Yes | Yes | Yes | Yes | Yes |
| **4** | **SML1082** | ***V. radiata*** | **Susceptible** | Yes | **NO** | **NO** | Yes | **NO** | Yes | Yes | Yes | Yes | Yes | Yes | Yes | Yes | Yes | **NO** | Yes |
| **5** | **SML1827** | ***V. radiata*** | **Resistance** | Yes | Yes | Yes | Yes | **NO** | Yes | Yes | Yes | Yes | Yes | Yes | Yes | Yes | Yes | Yes | **NO** |
| **6** | **RBL35** | ***V. umbellata*** | **Immune** | Yes | **NO** | Yes | Yes | Yes | Yes | Yes | Yes | Yes | Yes | Yes | Yes | Yes | Yes | Yes | Yes |

**Note:** "Yes" indicates amplification, while "No" indicates its absence.

**Table S6** Differential gene expression of PDS qPCR primers in black gram

| **qPCR Primers** | **Mash1-1 (R)** | **Function** | **KUG253 (S)** |
| --- | --- | --- | --- |
| **NB-ARC_2** | 1.5 (1.35 - 1.57) | **-** | 2.2 (1.72 - 2.77) |
| **NB-ARC_3** | 4.2 (2.54 - 6.3) | **-** | 8.1 (7.27 - 9.03) |
| **NB-ARC_4** | 4.1 (1.16 - 8.84) | **-** | 6.6 (3.18 - 11.23) |
| **NB-ARC_8** | 1.7 (0.94 - 2.59) | **-** | 7.9 (1.76 - 18.81) |
| **NB-ARC_12** | 3.4 (0.11 - 13.27) | **-** | 6.2 (2.57 - 11.48) |
| **NB-ARC_17** | 1.5 (0.56 - 2.94) | **-** | 11 (4.24 - 15.78) |

**Table S7** Differential gene expression of PDS qPCR primers in green gram

| **qPCR Primers** | **ML818 (R)** | **Function** | **SML1082 (S)** |
| --- | --- | --- | --- |
| **NB-ARC_2** | 2.3 (0.29 - 6.68) | + | 1.7 (1.59 - 1.72) |
| **NB-ARC_3** | 9 (0.03 - 51.94) | + | 4.7 (0.47 - 14.27) |
| **NB-ARC_4** | 23.8 (0 - 333.55) | + | 7.8 (0.09 - 37.03) |
| **NB-ARC_8** | 1.2 (0.57 - 1.98) | + | 1 (0.17 - 2.68) |
| **NB-ARC_12** | 2.2 (1.15 - 3.64) | + | 2 (0.81 - 3.77) |
| **NB-ARC_17** | 3.6 (2.24 - 4.78) | + | 3 (1.24 - 5.78) |

**Table S8** Differential gene expression of PDS qPCR primers in rice bean

| **qPCR Primers** | **RBL35 (R)** | **Function** | **SML1827 (R)** | **Function** | **SML1082 (S)** |
| --- | --- | --- | --- | --- | --- |
| **NB-ARC_2** | 1 (0.37 - 1.95) | - | 4.8 (2.76 - 7.52) | + | 1.7 (1.59 - 1.72) |
| **NB-ARC_3** | 1.5 (0.17 - 4.39) | - | 22.9 (11.07 - 39.06) | + | 4.7 (0.47 - 14.27) |
| **NB-ARC_4** | 7.1 (4.24 - 15.78) | - | 3.3 | - | 7.8 (0.09 - 37.03) |
| **NB-ARC_8** | 0.3 (0.04 - 0.69) | - | 2.4 (0.14 - 8.29) | + | 1 (0.17 - 2.68) |
| **NB-ARC_12** | 4.5 (3.05 - 6.14) | + | 0.7 (0.19 - 1.44) | - | 2 (0.81 - 3.77) |
| **NB-ARC_17** | 5.1 (4.34 - 9.78) | + | 3.5 (2.34 - 7.78) | + | 3 (1.24 - 5.78) |

**Note:** "+" indicates higher expression in resistant (R) genotype compared to susceptible one, while "-" indicates vice versa. The values in parentheses represent range of standard deviation (SD).

T**able S9** list of the newly identified functional RGAs

| ***Vigna* species** | **RGAs** |
| --- | --- |
| Green gram (ML818) | NB-ARC_2 |
| NB-ARC_3 |
| NB-ARC_4 |
| NB-ARC_8 |
| NB-ARC_12 |
| NB-ARC_17 |
| Rice bean (RBL35) | NB-ARC_12 |
| NB-ARC_17 |
| Rice bean derived line (SML1827) | NB-ARC_2 |
| NB-ARC_3 |
| NB-ARC_8 |
| NB-ARC_17 |
